# Supplementary material
Source: publisher figshare collection journal article supplement (https://acs.figshare.com/ndownloader/files/5690313)
Supplement: Supplementary file 1 [file 5690313]

 
# ic010049l.cif

data_global
 
_audit_creation_method                 Xtal3.6
_audit_creation_date                   00-12-27
_audit_update_record                   ?
 
#==============================================================================
#   (Publishing Staff Use Only)
 
_journal_date_recd_electronic          ?
_journal_date_to_coeditor              ?
_journal_date_from_coeditor            ?
_journal_date_accepted                 ?
_journal_date_printers_first           ?
_journal_date_printers_final           ?
_journal_date_proofs_out               ?
_journal_date_proofs_in                ?
_journal_coeditor_name                 ?
_journal_coeditor_code                 ?
_journal_coeditor_notes
; ?
;
_journal_techeditor_code               ?
_journal_techeditor_notes
; ?
;
_journal_coden_ASTM                    ?
_journal_name_full                     ?
_journal_year                          ?
_journal_volume                        ?
_journal_issue                         ?
_journal_page_first                    ?
_journal_page_last                     ?
_journal_suppl_publ_number             ?
_journal_suppl_publ_pages              ?
 
#=======================================================================
 
# 1. SUBMISSION DETAILS
#----------------------
 
_publ_contact_author_name
      'Skelton, B. W.'
_publ_contact_author_address
;
    Department of Chemistry
    University of Western Australia
    35 Stirling Highway
    Crawley
    Western Australia 6009
    Australia
;
_publ_contact_author_email            bws@crystal.uwa.edu.au
_publ_contact_author_fax               (+61)_08_9380_1118
_publ_contact_author_phone             (+61)_08-9380_3481
 
_publ_contact_letter
;    ?                                      #<< contact letter
;
 
_publ_requested_journal     ?
_publ_requested_category     ?
 
_publ_section_title
;    ?                                      #<< paper title text
;
_publ_section_title_footnote
;    ?                                      #<< paper footnote text
;
 
loop_
_publ_author_name
_publ_author_footnote
_publ_author_address
 
 
'Skelton, Brian W.' .
; Department of Chemistry,
University of Western Australia,
35 Stirling Highway,
Crawley,
WA 6009,
Australia.
;
 
 
 
 
_publ_section_synopsis
;    ?                                     #<< synopsis if FI,CI,CM,CO papers
;
_publ_section_abstract
;    ?                                     #<< abstract text
;
_publ_section_comment
;    ?                                     #<< scientific commentary text
;
 
_publ_section_exptl_prep
;    ?                        #<< material & crystal preparation text
;
 
_publ_section_exptl_refinement
;    ?
;
 
_publ_section_acknowledgements
;    ?
;
 
_publ_section_references
;
  Sheldrick, G M. (1996). SADABS. Pogram for Empirical Absorption Correction
   of Area Detector Data.  University of Gottingen, Germany.
 
  Siemens (1995). SMART and SAINT. Area-Detector Control and Integration
  Software. Siemens Analytical X-ray Systems Inc., Madison, Wisconsin, USA.
 
  Hall, S.R., King, G.S.D., and Stewart., J.M. (1995).
  The Xtal 3.5 User's Manual.  University of Western Australia, Lamb: Perth.
;
_publ_section_figure_captions
;    ?
;
 
 
#=======================================================================
#  Data block for single structure (one for each study in the paper)
#=======================================================================
 
 
data_191b49
 
 
# 2. EXPERIMENTAL DATA
#---------------------
 
 
 
_chemical_formula_sum                 'C16 H43 Cl.5 Cu1 N11.5 O15'
_chemical_formula_moiety               ?
_chemical_formula_weight               717.86
_chemical_melting_point                ?
 
_symmetry_cell_setting                 monoclinic
_symmetry_space_group_name_H-M         P_1_21/c_1
_symmetry_space_group_name_Hall        -p_2ybc
 
loop_
_symmetry_equiv_pos_as_xyz
   +x,+y,+z  -x,1/2+y,1/2-z  -x,-y,-z  +x,1/2-y,1/2+z
 
_cell_length_a                         11.0100(10)
_cell_length_b                         12.9430(10)
_cell_length_c                         19.680(2)
_cell_angle_alpha                      90.00000
_cell_angle_beta                       92.5060(10)
_cell_angle_gamma                      90.00000
_cell_volume                           2801.8(4)
_cell_formula_units_Z                  4
 
_exptl_crystal_density_diffrn          1.702
_exptl_crystal_density_meas            ?
_exptl_crystal_density_method          ?
_diffrn_radiation_type                'Mo K\a'
_diffrn_radiation_wavelength           .71073
 
_cell_measurement_reflns_used          8192
_cell_measurement_theta_min            2.4
_cell_measurement_theta_max            24.8
_cell_measurement_temperature          293
 
_exptl_absorpt_coefficient_mu          .92
_exptl_crystal_description             prism
_exptl_crystal_size_max                0.20
_exptl_crystal_size_mid                0.12
_exptl_crystal_size_min                0.07
_exptl_crystal_size_rad                ?
_exptl_crystal_colour                  blue
 
_diffrn_measurement_device_type
;
Bruker SMART CCD diffractometer
;
_diffrn_measurement_method             '\w scans'
_diffrn_detector_area_resol_mean       ?
 
_exptl_absorpt_correction_type         multi-scan
_exptl_absorpt_process_details
;
  SADABS; Sheldrick, 1996
;
_exptl_absorpt_correction_T_min        .81
_exptl_absorpt_correction_T_max        .93
 
_diffrn_reflns_number                  33222
_reflns_number_total                   7216
_reflns_Friedel_coverage               ?
_reflns_number_gt                      5737
_reflns_threshold_expression          'F    > 4.00 sig(F   )'
 
_diffrn_reflns_theta_max               58.0
_diffrn_reflns_theta_full              ?
_diffrn_measured_fraction_theta_max    ?
_diffrn_measured_fraction_theta_full   ?
_diffrn_reflns_av_R_equivalents        .031
_diffrn_reflns_limit_h_min             -14
_diffrn_reflns_limit_h_max             14
_diffrn_reflns_limit_k_min             0
_diffrn_reflns_limit_k_max             17
_diffrn_reflns_limit_l_min             -23
_diffrn_reflns_limit_l_max             23
_diffrn_standards_number               ?
_diffrn_standards_interval_count       ?
_diffrn_standards_interval_time        ?
_diffrn_standards_decay_%              0
 
 
_refine_ls_structure_factor_coef      F
_refine_ls_R_factor_gt                 .054
_refine_ls_wR_factor_ref               .066
_refine_ls_goodness_of_fit_ref        1.707
_refine_ls_number_reflns               5737
_refine_ls_number_parameters           594
_refine_ls_weighting_scheme            calc
_refine_ls_weighting_details           ?
_refine_ls_hydrogen_treatment          mixed
_refine_ls_shift/su_max                .069
_refine_diff_density_min               -.84
_refine_diff_density_max               1.47
 
_refine_ls_extinction_method           ?
_refine_ls_extinction_coef             ?
_refine_ls_abs_structure_details       ?
_refine_ls_abs_structure_Flack         ?
 
 
# 3. Information for the "methods" section
#-----------------------------------------
 
_computing_data_collection             'Siemens SMART (Siemens, 1995)'
_computing_cell_refinement             'Siemens SAINT (Siemens, 1995)'
_computing_data_reduction              xtal
_computing_structure_solution          xtal
_computing_structure_refinement        xtal
_computing_molecular_graphics          xtal
_computing_publication_material       'xtal BONDLA CIFIO'
 
 
# 4. Supplementary data for validation and tables
#------------------------------------------------
 
loop_
_atom_type_symbol
_atom_type_description
_atom_type_oxidation_number
_atom_type_number_in_cell
_atom_type_scat_dispersion_real
_atom_type_scat_dispersion_imag
_atom_type_scat_source
   C  ?  0  64  .002  .002  'Int Tables Vol IV Tables 2.2B and 2.3.1'
   H  ?  0  172  0  0  'Int Tables Vol IV Tables 2.2B and 2.3.1'
   Cl  ?  0  2  .132  .159  'Int Tables Vol IV Tables 2.2B and 2.3.1'
   Cu  ?  0  4  .263   1.266  'Int Tables Vol IV Tables 2.2B and 2.3.1'
   N  ?  0  46  .004  .003  'Int Tables Vol IV Tables 2.2B and 2.3.1'
   O  ?  0  60  .008  .006  'Int Tables Vol IV Tables 2.2B and 2.3.1'
 
loop_
_atom_site_label
_atom_site_fract_x
_atom_site_fract_y
_atom_site_fract_z
_atom_site_U_iso_or_equiv
_atom_site_adp_type
_atom_site_calc_flag
_atom_site_calc_attached_atom
_atom_site_occupancy
_atom_site_disorder_assembly
_atom_site_disorder_group
   Cu  .74037(3)  .36284(3)  .75096(2)  .02178(18)  Uani  ?  ?  1.00000  ?  ?
   N0  1.0629(3)  .3725(3)  .60173(15)  .0282(14)  Uani  ?  ?  1.00000  ?  ?
   C1  .9559(3)  .3584(2)  .64623(15)  .0236(14)  Uani  ?  ?  1.00000  ?  ?
   C2a  .8538(3)  .4287(3)  .61712(17)  .0251(15)  Uani  ?  ?  1.00000  ?  ?
   N3a  .7601(2)  .4534(2)  .66722(14)  .0230(12)  Uani  ?  ?  1.00000  ?  ?
   C4a  .6369(3)  .4627(3)  .63337(17)  .0258(15)  Uani  ?  ?  1.00000  ?  ?
   C4a'  .5462(3)  .4757(3)  .68798(17)  .0256(15)  Uani  ?  ?  1.00000  ?  ?
   N3a'  .5596(2)  .3878(2)  .73630(14)  .0232(13)  Uani  ?  ?  1.00000  ?  ?
   C2a'  .4924(3)  .4061(3)  .79917(16)  .0250(15)  Uani  ?  ?  1.00000  ?  ?
   C2b  1.0026(3)  .3969(3)  .71609(16)  .0258(15)  Uani  ?  ?  1.00000  ?  ?
   N3b  .9234(2)  .3732(2)  .77324(13)  .0219(12)  Uani  ?  ?  1.00000  ?  ?
   C4b  .9417(3)  .4540(3)  .82680(17)  .0267(16)  Uani  ?  ?  1.00000  ?  ?
   C4b'  .8583(3)  .4353(3)  .88425(17)  .0297(16)  Uani  ?  ?  1.00000  ?  ?
   N3b'  .7318(2)  .4417(2)  .85642(15)  .0257(13)  Uani  ?  ?  1.00000  ?  ?
   C2b'  .6414(3)  .3988(3)  .90162(17)  .0255(15)  Uani  ?  ?  1.00000  ?  ?
   C2c  .9261(3)  .2420(3)  .64165(17)  .0261(15)  Uani  ?  ?  1.00000  ?  ?
   N3c  .8064(2)  .2156(2)  .66801(13)  .0237(12)  Uani  ?  ?  1.00000  ?  ?
   C3c  .7128(3)  .1941(3)  .61433(17)  .0284(16)  Uani  ?  ?  1.00000  ?  ?
   C31c  .7110(3)  .0866(3)  .58371(16)  .0284(16)  Uani  ?  ?  1.00000  ?  ?
   O31c  .8186(2)  .0540(2)  .56524(14)  .0370(14)  Uani  ?  ?  1.00000  ?  ?
   O32c  .6177(2)  .0375(2)  .57592(15)  .0440(15)  Uani  ?  ?  1.00000  ?  ?
   C4c  .8131(3)  .1334(2)  .72000(16)  .0232(14)  Uani  ?  ?  1.00000  ?  ?
   C4c'  .7019(3)  .1331(2)  .76255(16)  .0238(14)  Uani  ?  ?  1.00000  ?  ?
   N3c'  .6963(2)  .2280(2)  .80471(14)  .0222(12)  Uani  ?  ?  1.00000  ?  ?
   C2c'  .5784(3)  .2323(2)  .83828(17)  .0239(15)  Uani  ?  ?  1.00000  ?  ?
   C1'  .5411(3)  .3414(2)  .85992(15)  .0225(14)  Uani  ?  ?  1.00000  ?  ?
   N0'  .4379(3)  .3256(3)  .90632(15)  .0267(14)  Uani  ?  ?  1.00000  ?  ?
   N1  1.1819(3)  .2237(2)  .82390(15)  .0340(15)  Uani  ?  ?  1.00000  ?  ?
   O11  1.0906(3)  .1759(2)  .80081(17)  .0558(18)  Uani  ?  ?  1.00000  ?  ?
   O12  1.1741(3)  .3150(2)  .84225(17)  .0566(18)  Uani  ?  ?  1.00000  ?  ?
   O13  1.2822(2)  .1801(2)  .83006(16)  .0431(15)  Uani  ?  ?  1.00000  ?  ?
   N2  .6838(2)  .7282(3)  .83231(16)  .0351(16)  Uani  ?  ?  1.00000  ?  ?
   O21  .5840(2)  .6859(3)  .81767(15)  .0496(16)  Uani  ?  ?  1.00000  ?  ?
   O22  .7714(3)  .6780(3)  .8569(2)  .068(2)  Uani  ?  ?  1.00000  ?  ?
   O23  .6970(3)  .8223(2)  .82277(16)  .0500(17)  Uani  ?  ?  1.00000  ?  ?
   N3  .8823(4)  .1268(3)  .93794(19)  .069(3)  Uani  ?  ?  1.00000  ?  ?
   O31  .8576(4)  .0817(3)  .88584(18)  .079(3)  Uani  ?  ?  1.00000  ?  ?
   O32  .9783(5)  .1003(5)  .9685(2)  .149(4)  Uani  ?  ?  1.00000  ?  ?
   O33  .8187(3)  .1976(3)  .96034(17)  .069(2)  Uani  ?  ?  1.00000  ?  ?
   N4  .6243(8)  .6307(7)  .4830(4)  .057(5)  Uani  ?  ?  .50000  ?  ?
   O41  .5266(15)  .6706(15)  .4927(9)  .064(7)  Uani  ?  ?  .50000  ?  ?
   O42  .7116(9)  .6673(14)  .4934(7)  .150(11)  Uani  ?  ?  .50000  ?  ?
   O43  .6181(14)  .5286(12)  .4605(5)  .102(7)  Uani  ?  ?  .50000  ?  ?
   Cl  .8268(6)  .8417(7)  .5040(3)  .175(6)  Uani  ?  ?  .50000  ?  ?
   O01  .9299(5)  .8303(6)  .4985(3)  .061(4)  Uani  ?  ?  .50000  ?  ?
   O02  .7752(8)  .7188(6)  .4917(4)  .067(5)  Uani  ?  ?  .50000  ?  ?
   O03  .5053(18)  .7017(17)  .4843(11)  .088(10)  Uani  ?  ?  .50000  ?  ?
   O04  .664(3)  .501(2)  .4529(11)  .31(3)  Uani  ?  ?  .50000  ?  ?
   O05  .7509(5)  .8832(4)  .5066(3)  .032(2)  Uani  ?  ?  .50000  ?  ?
   H0A  1.040(4)  .358(3)  .558(2)  .037(11)  Uiso  ?  ?  1.00000  ?  ?
   H0B  1.091(3)  .434(3)  .6041(18)  .024(9)  Uiso  ?  ?  1.00000  ?  ?
   H0C  1.123(4)  .333(3)  .615(2)  .037(11)  Uiso  ?  ?  1.00000  ?  ?
   H2aA  .893(3)  .490(3)  .5995(18)  .028(9)  Uiso  ?  ?  1.00000  ?  ?
   H2aB  .814(3)  .397(3)  .577(2)  .034(10)  Uiso  ?  ?  1.00000  ?  ?
   H3a  .778(3)  .511(3)  .6840(19)  .031(10)  Uiso  ?  ?  1.00000  ?  ?
   H4aA  .640(4)  .527(3)  .598(2)  .055(13)  Uiso  ?  ?  1.00000  ?  ?
   H4aB  .618(3)  .398(3)  .6069(16)  .016(8)  Uiso  ?  ?  1.00000  ?  ?
   H4a'A  .566(3)  .532(3)  .7115(17)  .019(8)  Uiso  ?  ?  1.00000  ?  ?
   H4a'B  .465(3)  .482(3)  .6681(18)  .030(9)  Uiso  ?  ?  1.00000  ?  ?
   H3a'  .532(3)  .339(3)  .721(2)  .031(11)  Uiso  ?  ?  1.00000  ?  ?
   H2a'A  .504(3)  .474(3)  .8116(18)  .025(9)  Uiso  ?  ?  1.00000  ?  ?
   H2a'B  .410(4)  .385(3)  .792(2)  .041(11)  Uiso  ?  ?  1.00000  ?  ?
   H2bA  1.076(3)  .369(3)  .7239(18)  .025(9)  Uiso  ?  ?  1.00000  ?  ?
   H2bB  1.009(3)  .471(3)  .7140(17)  .025(9)  Uiso  ?  ?  1.00000  ?  ?
   H3b  .944(4)  .324(3)  .789(2)  .039(12)  Uiso  ?  ?  1.00000  ?  ?
   H4bA  1.026(3)  .457(3)  .8405(17)  .020(8)  Uiso  ?  ?  1.00000  ?  ?
   H4bB  .923(3)  .510(3)  .8077(18)  .022(9)  Uiso  ?  ?  1.00000  ?  ?
   H4b'A  .875(3)  .366(3)  .9037(19)  .028(9)  Uiso  ?  ?  1.00000  ?  ?
   H4b'B  .873(3)  .485(3)  .919(2)  .033(10)  Uiso  ?  ?  1.00000  ?  ?
   H3b'  .713(3)  .494(3)  .8507(19)  .022(10)  Uiso  ?  ?  1.00000  ?  ?
   H2b'A  .676(3)  .357(3)  .9301(18)  .022(9)  Uiso  ?  ?  1.00000  ?  ?
   H2b'B  .602(3)  .454(3)  .9266(17)  .019(8)  Uiso  ?  ?  1.00000  ?  ?
   H2cA  .929(3)  .224(3)  .5967(17)  .018(8)  Uiso  ?  ?  1.00000  ?  ?
   H2cB  .985(3)  .210(3)  .6674(18)  .028(9)  Uiso  ?  ?  1.00000  ?  ?
   H3cA  .714(3)  .237(3)  .5753(18)  .023(9)  Uiso  ?  ?  1.00000  ?  ?
   H3cB  .642(4)  .203(3)  .627(2)  .041(11)  Uiso  ?  ?  1.00000  ?  ?
   H3ca  .810(6)  .001(5)  .548(3)  .09(2)  Uiso  ?  ?  1.00000  ?  ?
   H4cA  .822(3)  .065(3)  .6990(17)  .024(9)  Uiso  ?  ?  1.00000  ?  ?
   H4cB  .880(3)  .142(2)  .7496(17)  .016(8)  Uiso  ?  ?  1.00000  ?  ?
   H4c'A  .631(3)  .132(3)  .7339(18)  .022(8)  Uiso  ?  ?  1.00000  ?  ?
   H4c'B  .703(3)  .075(3)  .7933(19)  .030(9)  Uiso  ?  ?  1.00000  ?  ?
   H3c'  .745(3)  .220(3)  .831(2)  .027(10)  Uiso  ?  ?  1.00000  ?  ?
   H2c'A  .515(3)  .206(2)  .8083(15)  .009(7)  Uiso  ?  ?  1.00000  ?  ?
   H2c'B  .578(3)  .190(3)  .8761(17)  .020(8)  Uiso  ?  ?  1.00000  ?  ?
   H0'A  .379(3)  .292(3)  .8829(19)  .028(9)  Uiso  ?  ?  1.00000  ?  ?
   H0'B  .463(4)  .287(3)  .946(2)  .046(12)  Uiso  ?  ?  1.00000  ?  ?
   H0'C  .414(3)  .381(3)  .9193(18)  .020(9)  Uiso  ?  ?  1.00000  ?  ?
 
loop_
_atom_site_aniso_label
_atom_site_aniso_U_11
_atom_site_aniso_U_22
_atom_site_aniso_U_33
_atom_site_aniso_U_12
_atom_site_aniso_U_13
_atom_site_aniso_U_23
   Cu  .01871(18)  .02263(19)  .02378(19)  .00207(14)  -.00151(13)  .00134(16)
   N0  .0228(13)  .0360(17)  .0261(15)  .0029(12)  .0021(11)  .0022(13)
   C1  .0218(13)  .0250(15)  .0240(14)  .0034(12)  .0019(11)  -.0003(12)
   C2a  .0248(14)  .0254(16)  .0252(15)  .0030(12)  .0013(12)  .0017(13)
   N3a  .0223(12)  .0207(13)  .0258(13)  .0033(10)  -.0016(10)  .0003(11)
   C4a  .0230(14)  .0277(16)  .0265(16)  .0066(12)  -.0017(12)  .0003(13)
   C4a'  .0244(15)  .0248(16)  .0274(16)  .0065(12)  -.0021(12)  .0012(13)
   N3a'  .0227(12)  .0227(13)  .0238(13)  .0030(10)  -.0021(10)  -.0022(11)
   C2a'  .0221(14)  .0258(16)  .0270(16)  .0042(12)  .0001(12)  -.0026(13)
   C2b  .0186(14)  .0332(18)  .0257(16)  -.0018(12)  .0005(11)  .0002(13)
   N3b  .0211(11)  .0223(13)  .0223(12)  .0015(10)  -.0009(9)  -.0004(11)
   C4b  .0231(15)  .0252(16)  .0315(17)  -.0024(12)  -.0019(13)  -.0058(14)
   C4b'  .0234(15)  .039(2)  .0264(16)  -.0037(13)  -.0019(12)  -.0091(15)
   N3b'  .0224(13)  .0248(15)  .0298(14)  .0006(11)  -.0012(10)  -.0041(12)
   C2b'  .0228(14)  .0298(16)  .0237(15)  .0008(12)  -.0004(12)  -.0035(13)
   C2c  .0253(15)  .0252(16)  .0279(16)  .0053(12)  .0018(12)  -.0012(13)
   N3c  .0236(12)  .0220(13)  .0252(13)  .0016(10)  -.0011(10)  .0009(10)
   C3c  .0266(16)  .0308(18)  .0273(17)  .0036(13)  -.0030(13)  .0014(14)
   C31c  .0337(16)  .0300(17)  .0211(15)  -.0016(13)  -.0028(12)  .0029(13)
   O31c  .0408(14)  .0330(14)  .0372(14)  .0004(11)  .0027(11)  -.0119(12)
   O32c  .0408(14)  .0373(15)  .0538(17)  -.0114(12)  -.0010(12)  .0034(13)
   C4c  .0239(14)  .0210(14)  .0245(15)  .0030(12)  -.0015(11)  -.0020(13)
   C4c'  .0250(14)  .0200(14)  .0262(15)  .0002(12)  -.0019(12)  -.0002(13)
   N3c'  .0189(12)  .0231(13)  .0243(13)  .0020(10)  -.0033(10)  -.0021(11)
   C2c'  .0224(14)  .0235(15)  .0258(15)  .0005(12)  .0011(12)  -.0001(13)
   C1'  .0189(13)  .0256(15)  .0229(14)  .0021(11)  .0005(11)  -.0025(12)
   N0'  .0235(13)  .0314(15)  .0254(14)  .0019(12)  .0018(11)  -.0034(13)
   N1  .0328(15)  .0327(16)  .0356(16)  .0037(12)  -.0104(12)  .0008(13)
   O11  .0431(16)  .0452(17)  .076(2)  -.0058(13)  -.0292(15)  .0006(16)
   O12  .0612(19)  .0363(16)  .069(2)  .0172(14)  -.0294(16)  -.0196(15)
   O13  .0271(12)  .0313(13)  .071(2)  .0054(10)  -.0021(12)  .0037(13)
   N2  .0217(13)  .0394(17)  .0435(17)  -.0001(12)  -.0049(12)  -.0069(14)
   O21  .0285(13)  .066(2)  .0537(17)  -.0160(13)  -.0029(12)  -.0091(15)
   O22  .0331(15)  .0518(19)  .118(3)  .0123(14)  -.0201(17)  -.001(2)
   O23  .0453(16)  .0424(16)  .0611(19)  -.0026(13)  -.0118(14)  .0050(14)
   N3  .102(3)  .072(3)  .0320(19)  .051(3)  -.008(2)  -.0025(19)
   O31  .100(3)  .086(3)  .051(2)  .044(2)  -.013(2)  -.017(2)
   O32  .154(4)  .209(6)  .078(3)  .143(4)  -.068(3)  -.079(3)
   O33  .094(3)  .060(2)  .054(2)  .047(2)  .0075(18)  -.0030(16)
   N4  .061(5)  .075(6)  .035(4)  .005(4)  .001(3)  -.001(4)
   O41  .044(5)  .093(11)  .054(6)  .030(5)  -.012(5)  -.036(6)
   O42  .051(5)  .263(18)  .137(10)  -.054(8)  .012(6)  .024(10)
   O43  .148(9)  .118(9)  .037(4)  .100(8)  -.025(5)  -.031(5)
   Cl  .137(4)  .304(9)  .085(3)  .065(5)  .027(3)  .054(4)
   O01  .033(3)  .087(5)  .064(4)  .003(3)  .008(3)  -.006(4)
   O02  .083(5)  .042(4)  .076(5)  .022(4)  .023(4)  -.014(3)
   O03  .074(9)  .107(13)  .080(8)  .035(7)  -.044(6)  -.054(8)
   O04  .51(5)  .24(3)  .166(19)  -.20(3)  -.22(2)  .108(18)
   O05  .040(3)  .025(2)  .032(3)  -.004(2)  .016(2)  -.014(2)
 
 
# 5. Molecular Geometry
#----------------------
 
loop_
_geom_bond_atom_site_label_1
_geom_bond_atom_site_label_2
_geom_bond_site_symmetry_1
_geom_bond_site_symmetry_2
_geom_bond_distance
_geom_bond_publ_flag                 #<< enter YES for value to be published
   Cu  N3a  .  .  2.042(3)  ?
   Cu  N3a'  .  .  2.024(3)  ?
   Cu  N3b  .  .  2.047(2)  ?
   Cu  N3b'  .  .  2.318(3)  ?
   Cu  N3c'  .  .  2.108(3)  ?
   N0  C1  .  .  1.509(4)  ?
   N0  H0A  .  .  .91(4)  ?
   N0  H0B  .  .  .85(4)  ?
   N0  H0C  .  .  .87(4)  ?
   C1  C2a  .  .  1.537(4)  ?
   C1  C2b  .  .  1.530(4)  ?
   C1  C2c  .  .  1.544(4)  ?
   C2a  N3a  .  .  1.493(4)  ?
   C2a  H2aA  .  .  .97(4)  ?
   C2a  H2aB  .  .  .97(4)  ?
   N3a  C4a  .  .  1.489(4)  ?
   N3a  H3a  .  .  .83(4)  ?
   C4a  C4a'  .  .  1.508(5)  ?
   C4a  H4aA  .  .  1.09(4)  ?
   C4a  H4aB  .  .  1.01(3)  ?
   C4a'  N3a'  .  .  1.486(4)  ?
   C4a'  H4a'A  .  .  .89(3)  ?
   C4a'  H4a'B  .  .  .96(4)  ?
   N3a'  C2a'  .  .  1.488(4)  ?
   N3a'  H3a'  .  .  .76(4)  ?
   C2a'  C1'  .  .  1.538(4)  ?
   C2a'  H2a'A  .  .  .92(4)  ?
   C2a'  H2a'B  .  .  .95(4)  ?
   C2b  N3b  .  .  1.485(4)  ?
   C2b  H2bA  .  .  .90(4)  ?
   C2b  H2bB  .  .  .96(4)  ?
   N3b  C4b  .  .  1.492(4)  ?
   N3b  H3b  .  .  .74(4)  ?
   C4b  C4b'  .  .  1.507(5)  ?
   C4b  H4bA  .  .  .96(3)  ?
   C4b  H4bB  .  .  .84(4)  ?
   C4b'  N3b'  .  .  1.476(4)  ?
   C4b'  H4b'A  .  .  .99(4)  ?
   C4b'  H4b'B  .  .  .95(4)  ?
   N3b'  C2b'  .  .  1.472(4)  ?
   N3b'  H3b'  .  .  .72(4)  ?
   C2b'  C1'  .  .  1.538(4)  ?
   C2b'  H2b'A  .  .  .86(3)  ?
   C2b'  H2b'B  .  .  .98(3)  ?
   C2c  N3c  .  .  1.477(4)  ?
   C2c  H2cA  .  .  .92(3)  ?
   C2c  H2cB  .  .  .91(4)  ?
   N3c  C3c  .  .  1.470(4)  ?
   N3c  C4c  .  .  1.476(4)  ?
   C3c  C31c  .  .  1.517(5)  ?
   C3c  H3cA  .  .  .95(4)  ?
   C3c  H3cB  .  .  .83(4)  ?
   C31c  O31c  .  .  1.323(4)  ?
   C31c  O32c  .  .  1.212(4)  ?
   O31c  H3ca  .  .  .76(6)  ?
   C4c  C4c'  .  .  1.513(4)  ?
   C4c  H4cA  .  .  .98(4)  ?
   C4c  H4cB  .  .  .93(3)  ?
   C4c'  N3c'  .  .  1.485(4)  ?
   C4c'  H4c'A  .  .  .94(3)  ?
   C4c'  H4c'B  .  .  .97(4)  ?
   N3c'  C2c'  .  .  1.483(4)  ?
   N3c'  H3c'  .  .  .74(4)  ?
   C2c'  C1'  .  .  1.536(4)  ?
   C2c'  H2c'A  .  .  .95(3)  ?
   C2c'  H2c'B  .  .  .93(3)  ?
   C1'  N0'  .  .  1.503(4)  ?
   N0'  H0'A  .  .  .89(4)  ?
   N0'  H0'B  .  .  .95(4)  ?
   N0'  H0'C  .  .  .81(4)  ?
   N1  O11  .  .  1.248(4)  ?
   N1  O12  .  .  1.240(4)  ?
   N1  O13  .  .  1.242(4)  ?
   N2  O21  .  .  1.250(4)  ?
   N2  O22  .  .  1.243(4)  ?
   N2  O23  .  .  1.241(4)  ?
   N3  O31  .  .  1.201(5)  ?
   N3  O32  .  .  1.242(7)  ?
   N3  O33  .  .  1.246(6)  ?
   N4  O41  .  .  1.22(2)  ?
   N4  O42  .  .  1.083(14)  ?
   N4  O43  .  .  1.394(18)  ?
   N4  O03  .  .  1.60(2)  ?
   O41  O03  .  .  .49(3)  ?
   O42  O02  .  .  .969(16)  ?
   O43  O04  .  .  .65(3)  ?
   Cl  O01  .  .  1.155(9)  ?
   Cl  O02  .  .  1.703(11)  ?
   Cl  O05  .  .  .996(9)  ?
 
loop_
_geom_angle_atom_site_label_1
_geom_angle_atom_site_label_2
_geom_angle_atom_site_label_3
_geom_angle_site_symmetry_1
_geom_angle_site_symmetry_2
_geom_angle_site_symmetry_3
_geom_angle
_geom_angle_publ_flag                #<< enter YES for value to be published
   N3a  Cu  N3a'  .  .  .  86.10(10)  ?
   N3a  Cu  N3b  .  .  .  89.82(10)  ?
   N3a  Cu  N3b'  .  .  .  118.69(11)  ?
   N3a  Cu  N3c'  .  .  .  156.22(11)  ?
   N3a'  Cu  N3b  .  .  .  166.43(11)  ?
   N3a'  Cu  N3b'  .  .  .  88.80(10)  ?
   N3a'  Cu  N3c'  .  .  .  87.55(10)  ?
   N3b  Cu  N3b'  .  .  .  81.82(10)  ?
   N3b  Cu  N3c'  .  .  .  101.11(10)  ?
   N3b'  Cu  N3c'  .  .  .  84.02(10)  ?
   C1  N0  H0A  .  .  .  110(3)  ?
   C1  N0  H0B  .  .  .  112(2)  ?
   C1  N0  H0C  .  .  .  110(3)  ?
   H0A  N0  H0B  .  .  .  109(3)  ?
   H0A  N0  H0C  .  .  .  110(4)  ?
   H0B  N0  H0C  .  .  .  106(4)  ?
   N0  C1  C2a  .  .  .  106.8(2)  ?
   N0  C1  C2b  .  .  .  104.0(2)  ?
   N0  C1  C2c  .  .  .  104.7(3)  ?
   C2a  C1  C2b  .  .  .  110.7(3)  ?
   C2a  C1  C2c  .  .  .  113.9(2)  ?
   C2b  C1  C2c  .  .  .  115.6(3)  ?
   C1  C2a  N3a  .  .  .  113.3(3)  ?
   C1  C2a  H2aA  .  .  .  107(2)  ?
   C1  C2a  H2aB  .  .  .  110(2)  ?
   N3a  C2a  H2aA  .  .  .  113(2)  ?
   N3a  C2a  H2aB  .  .  .  109(2)  ?
   H2aA  C2a  H2aB  .  .  .  104(3)  ?
   Cu  N3a  C2a  .  .  .  120.7(2)  ?
   Cu  N3a  C4a  .  .  .  106.31(19)  ?
   Cu  N3a  H3a  .  .  .  103(3)  ?
   C2a  N3a  C4a  .  .  .  111.4(2)  ?
   C2a  N3a  H3a  .  .  .  107(3)  ?
   C4a  N3a  H3a  .  .  .  108(3)  ?
   N3a  C4a  C4a'  .  .  .  108.0(3)  ?
   N3a  C4a  H4aA  .  .  .  108(2)  ?
   N3a  C4a  H4aB  .  .  .  109.2(18)  ?
   C4a'  C4a  H4aA  .  .  .  114(2)  ?
   C4a'  C4a  H4aB  .  .  .  109.4(18)  ?
   H4aA  C4a  H4aB  .  .  .  108(3)  ?
   C4a  C4a'  N3a'  .  .  .  108.7(3)  ?
   C4a  C4a'  H4a'A  .  .  .  108(2)  ?
   C4a  C4a'  H4a'B  .  .  .  111(2)  ?
   N3a'  C4a'  H4a'A  .  .  .  106(2)  ?
   N3a'  C4a'  H4a'B  .  .  .  113(2)  ?
   H4a'A  C4a'  H4a'B  .  .  .  110(3)  ?
   Cu  N3a'  C4a'  .  .  .  106.45(19)  ?
   Cu  N3a'  C2a'  .  .  .  115.38(19)  ?
   Cu  N3a'  H3a'  .  .  .  107(3)  ?
   C4a'  N3a'  C2a'  .  .  .  111.7(2)  ?
   C4a'  N3a'  H3a'  .  .  .  110(3)  ?
   C2a'  N3a'  H3a'  .  .  .  105(3)  ?
   N3a'  C2a'  C1'  .  .  .  112.9(3)  ?
   N3a'  C2a'  H2a'A  .  .  .  108(2)  ?
   N3a'  C2a'  H2a'B  .  .  .  110(2)  ?
   C1'  C2a'  H2a'A  .  .  .  106(2)  ?
   C1'  C2a'  H2a'B  .  .  .  105(2)  ?
   H2a'A  C2a'  H2a'B  .  .  .  116(3)  ?
   C1  C2b  N3b  .  .  .  115.4(3)  ?
   C1  C2b  H2bA  .  .  .  107(2)  ?
   C1  C2b  H2bB  .  .  .  108(2)  ?
   N3b  C2b  H2bA  .  .  .  110(2)  ?
   N3b  C2b  H2bB  .  .  .  107(2)  ?
   H2bA  C2b  H2bB  .  .  .  110(3)  ?
   Cu  N3b  C2b  .  .  .  117.14(19)  ?
   Cu  N3b  C4b  .  .  .  107.39(18)  ?
   Cu  N3b  H3b  .  .  .  109(3)  ?
   C2b  N3b  C4b  .  .  .  108.9(3)  ?
   C2b  N3b  H3b  .  .  .  108(3)  ?
   C4b  N3b  H3b  .  .  .  106(3)  ?
   N3b  C4b  C4b'  .  .  .  110.4(3)  ?
   N3b  C4b  H4bA  .  .  .  109(2)  ?
   N3b  C4b  H4bB  .  .  .  105(2)  ?
   C4b'  C4b  H4bA  .  .  .  114(2)  ?
   C4b'  C4b  H4bB  .  .  .  110(2)  ?
   H4bA  C4b  H4bB  .  .  .  108(3)  ?
   C4b  C4b'  N3b'  .  .  .  108.0(3)  ?
   C4b  C4b'  H4b'A  .  .  .  109(2)  ?
   C4b  C4b'  H4b'B  .  .  .  110(2)  ?
   N3b'  C4b'  H4b'A  .  .  .  111(2)  ?
   N3b'  C4b'  H4b'B  .  .  .  111(2)  ?
   H4b'A  C4b'  H4b'B  .  .  .  108(3)  ?
   Cu  N3b'  C4b'  .  .  .  103.5(2)  ?
   Cu  N3b'  C2b'  .  .  .  115.5(2)  ?
   Cu  N3b'  H3b'  .  .  .  107(3)  ?
   C4b'  N3b'  C2b'  .  .  .  114.0(3)  ?
   C4b'  N3b'  H3b'  .  .  .  112(3)  ?
   C2b'  N3b'  H3b'  .  .  .  105(3)  ?
   N3b'  C2b'  C1'  .  .  .  110.4(3)  ?
   N3b'  C2b'  H2b'A  .  .  .  110(2)  ?
   N3b'  C2b'  H2b'B  .  .  .  111(2)  ?
   C1'  C2b'  H2b'A  .  .  .  109(2)  ?
   C1'  C2b'  H2b'B  .  .  .  107.4(19)  ?
   H2b'A  C2b'  H2b'B  .  .  .  109(3)  ?
   C1  C2c  N3c  .  .  .  113.4(3)  ?
   C1  C2c  H2cA  .  .  .  107(2)  ?
   C1  C2c  H2cB  .  .  .  106(2)  ?
   N3c  C2c  H2cA  .  .  .  110(2)  ?
   N3c  C2c  H2cB  .  .  .  109(2)  ?
   H2cA  C2c  H2cB  .  .  .  112(3)  ?
   C2c  N3c  C3c  .  .  .  113.6(3)  ?
   C2c  N3c  C4c  .  .  .  113.1(2)  ?
   C3c  N3c  C4c  .  .  .  112.0(2)  ?
   N3c  C3c  C31c  .  .  .  117.1(3)  ?
   N3c  C3c  H3cA  .  .  .  116(2)  ?
   N3c  C3c  H3cB  .  .  .  113(3)  ?
   C31c  C3c  H3cA  .  .  .  103(2)  ?
   C31c  C3c  H3cB  .  .  .  105(3)  ?
   H3cA  C3c  H3cB  .  .  .  101(3)  ?
   C3c  C31c  O31c  .  .  .  113.9(3)  ?
   C3c  C31c  O32c  .  .  .  121.8(3)  ?
   O31c  C31c  O32c  .  .  .  124.3(3)  ?
   C31c  O31c  H3ca  .  .  .  108(5)  ?
   N3c  C4c  C4c'  .  .  .  111.6(2)  ?
   N3c  C4c  H4cA  .  .  .  111(2)  ?
   N3c  C4c  H4cB  .  .  .  111(2)  ?
   C4c'  C4c  H4cA  .  .  .  109(2)  ?
   C4c'  C4c  H4cB  .  .  .  107(2)  ?
   H4cA  C4c  H4cB  .  .  .  107(3)  ?
   C4c  C4c'  N3c'  .  .  .  111.2(2)  ?
   C4c  C4c'  H4c'A  .  .  .  110(2)  ?
   C4c  C4c'  H4c'B  .  .  .  111(2)  ?
   N3c'  C4c'  H4c'A  .  .  .  107(2)  ?
   N3c'  C4c'  H4c'B  .  .  .  107(2)  ?
   H4c'A  C4c'  H4c'B  .  .  .  111(3)  ?
   Cu  N3c'  C4c'  .  .  .  112.8(2)  ?
   Cu  N3c'  C2c'  .  .  .  114.68(19)  ?
   Cu  N3c'  H3c'  .  .  .  107(3)  ?
   C4c'  N3c'  C2c'  .  .  .  109.8(2)  ?
   C4c'  N3c'  H3c'  .  .  .  104(3)  ?
   C2c'  N3c'  H3c'  .  .  .  108(3)  ?
   N3c'  C2c'  C1'  .  .  .  114.0(2)  ?
   N3c'  C2c'  H2c'A  .  .  .  109.7(18)  ?
   N3c'  C2c'  H2c'B  .  .  .  112(2)  ?
   C1'  C2c'  H2c'A  .  .  .  107.5(18)  ?
   C1'  C2c'  H2c'B  .  .  .  108(2)  ?
   H2c'A  C2c'  H2c'B  .  .  .  105(3)  ?
   C2a'  C1'  C2b'  .  .  .  111.7(3)  ?
   C2a'  C1'  C2c'  .  .  .  112.0(3)  ?
   C2a'  C1'  N0'  .  .  .  107.4(2)  ?
   C2b'  C1'  C2c'  .  .  .  113.5(2)  ?
   C2b'  C1'  N0'  .  .  .  106.6(2)  ?
   C2c'  C1'  N0'  .  .  .  105.2(2)  ?
   C1'  N0'  H0'A  .  .  .  108(2)  ?
   C1'  N0'  H0'B  .  .  .  112(3)  ?
   C1'  N0'  H0'C  .  .  .  110(3)  ?
   H0'A  N0'  H0'B  .  .  .  110(3)  ?
   H0'A  N0'  H0'C  .  .  .  110(3)  ?
   H0'B  N0'  H0'C  .  .  .  107(4)  ?
   O11  N1  O12  .  .  .  120.9(3)  ?
   O11  N1  O13  .  .  .  120.6(3)  ?
   O12  N1  O13  .  .  .  118.5(3)  ?
   O21  N2  O22  .  .  .  121.3(3)  ?
   O21  N2  O23  .  .  .  120.1(3)  ?
   O22  N2  O23  .  .  .  118.6(3)  ?
   O31  N3  O32  .  .  .  115.9(5)  ?
   O31  N3  O33  .  .  .  123.3(5)  ?
   O32  N3  O33  .  .  .  120.8(4)  ?
   O41  N4  O42  .  .  .  124.6(15)  ?
   O41  N4  O43  .  .  .  114.9(13)  ?
   O41  N4  O03  .  .  .  12.5(12)  ?
   O42  N4  O43  .  .  .  120.4(13)  ?
   O42  N4  O03  .  .  .  117.7(14)  ?
   O43  N4  O03  .  .  .  121.3(11)  ?
   N4  O41  O03  .  .  .  135(4)  ?
   N4  O42  O02  .  .  .  158.8(18)  ?
   N4  O43  O04  .  .  .  125(3)  ?
   O01  Cl  O02  .  .  .  101.0(7)  ?
   O01  Cl  O05  .  .  .  154.7(10)  ?
   O02  Cl  O05  .  .  .  103.6(6)  ?
   O42  O02  Cl  .  .  .  151.0(12)  ?
   N4  O03  O41  .  .  .  32(3)  ?
 
loop_
_geom_torsion_atom_site_label_1
_geom_torsion_atom_site_label_2
_geom_torsion_atom_site_label_3
_geom_torsion_atom_site_label_4
_geom_torsion_site_symmetry_1
_geom_torsion_site_symmetry_2
_geom_torsion_site_symmetry_3
_geom_torsion_site_symmetry_4
_geom_torsion
_geom_torsion_publ_flag              #<< enter YES for value to be published
      ?  ?  ?  ?  ?  ?  ?  ?  ?  ?
 
loop_
_geom_hbond_atom_site_label_D
_geom_hbond_atom_site_label_H
_geom_hbond_atom_site_label_A
_geom_hbond_site_symmetry_D
_geom_hbond_site_symmetry_H
_geom_hbond_site_symmetry_A
_geom_hbond_distance_DH
_geom_hbond_distance_HA
_geom_hbond_distance_DA
_geom_hbond_angle_DHA
_geom_hbond_publ_flag               #<< enter YES for value to be published
       ?  ?  ?  ?  ?  ?  ?  ?  ?  ?  ?
 
 
#--------------------------------------------------------------------------
#      Special items requested by author for inclusion in paper
#--------------------------------------------------------------------------
 
loop_
_publ_manuscript_incl_extra_item
_publ_manuscript_incl_extra_defn
                        ?  ?
 
#--------------------------------------------------------------------------
#       Items which are non-mandatory for Acta C submissions
#--------------------------------------------------------------------------
 
loop_
_geom_contact_atom_site_label_1
_geom_contact_atom_site_label_2
_geom_contact_distance
_geom_contact_site_symmetry_1
_geom_contact_site_symmetry_2
_geom_contact_publ_flag
   Cu  C1  3.211(3)  .  .  ?
   Cu  C2a  3.084(3)  .  .  ?
   Cu  C4a  2.845(3)  .  .  ?
   Cu  C4a'  2.830(3)  .  .  ?
   Cu  C2a'  2.982(3)  .  .  ?
   Cu  C2b  3.028(3)  .  .  ?
   Cu  C4b  2.871(3)  .  .  ?
   Cu  C4b'  3.024(3)  .  .  ?
   Cu  C2b'  3.237(3)  .  .  ?
   Cu  C2c  3.412(3)  .  .  ?
   Cu  N3c  2.633(3)  .  .  ?
   Cu  C3c  3.467(3)  .  .  ?
   Cu  C4c  3.143(3)  .  .  ?
   Cu  C4c'  3.013(3)  .  .  ?
   Cu  C2c'  3.043(3)  .  .  ?
   Cu  C1'  3.146(3)  .  .  ?
   Cu  H3a  2.37(4)  .  .  ?
   Cu  H4aB  3.12(3)  .  .  ?
   Cu  H4a'A  3.00(3)  .  .  ?
   Cu  H3a'  2.37(4)  .  .  ?
   Cu  H2a'A  3.25(3)  .  .  ?
   Cu  H3b  2.39(4)  .  .  ?
   Cu  H4bB  2.96(4)  .  .  ?
   Cu  H4b'A  3.29(4)  .  .  ?
   Cu  H3b'  2.62(4)  .  .  ?
   Cu  H4cB  3.24(3)  .  .  ?
   Cu  H4c'A  3.23(3)  .  .  ?
   Cu  H3c'  2.43(4)  .  .  ?
   N0  C2a  2.445(4)  .  .  ?
   N0  N3a  3.774(4)  .  .  ?
   N0  C2b  2.395(4)  .  .  ?
   N0  N3b  3.769(4)  .  .  ?
   N0  C2c  2.417(4)  .  .  ?
   N0  N3c  3.758(4)  .  .  ?
   N0  N2  3.555(4)  .  '2 746'  ?
   N0  O22  3.195(5)  .  '2 746'  ?
   N0  O23  3.046(4)  .  '2 746'  ?
   N0  N3  3.712(5)  .  '4 554'  ?
   N0  N3  3.442(6)  .  '2 756'  ?
   N0  O31  2.853(5)  .  '2 756'  ?
   N0  O32  2.765(5)  .  '4 554'  ?
   N0  O32  3.279(7)  .  '2 756'  ?
   N0  N4  3.892(9)  .  '3 766'  ?
   N0  O42  3.216(12)  .  '3 766'  ?
   N0  Cl  3.704(8)  .  '3 766'  ?
   N0  O01  3.287(8)  .  '3 766'  ?
   N0  O02  2.871(9)  .  '3 766'  ?
   N0  O04  3.63(3)  .  '3 766'  ?
   N0  H2aA  2.41(4)  .  .  ?
   N0  H2aB  2.78(4)  .  .  ?
   N0  H2bA  2.40(4)  .  .  ?
   N0  H2bB  2.64(4)  .  .  ?
   N0  H2cA  2.43(3)  .  .  ?
   N0  H2cB  2.63(4)  .  .  ?
   C1  N3a  2.531(4)  .  .  ?
   C1  N3b  2.548(4)  .  .  ?
   C1  N3c  2.525(4)  .  .  ?
   C1  H0A  2.01(4)  .  .  ?
   C1  H0B  1.99(4)  .  .  ?
   C1  H0C  1.99(4)  .  .  ?
   C1  H2aA  2.04(4)  .  .  ?
   C1  H2aB  2.08(4)  .  .  ?
   C1  H2bA  1.98(4)  .  .  ?
   C1  H2bB  2.04(4)  .  .  ?
   C1  H2cA  2.01(3)  .  .  ?
   C1  H2cB  1.99(4)  .  .  ?
   C2a  C4a  2.463(4)  .  .  ?
   C2a  C2b  2.523(4)  .  .  ?
   C2a  N3b  3.215(4)  .  .  ?
   C2a  C2c  2.583(5)  .  .  ?
   C2a  N3c  2.988(4)  .  .  ?
   C2a  N3  3.626(5)  .  '4 554'  ?
   C2a  H0A  2.57(4)  .  .  ?
   C2a  H0B  2.63(3)  .  .  ?
   C2a  H3a  1.91(4)  .  .  ?
   C2a  H4aA  2.69(4)  .  .  ?
   C2a  H4aB  2.63(3)  .  .  ?
   C2a  H2bB  2.56(3)  .  .  ?
   N3a  C4a'  2.425(4)  .  .  ?
   N3a  N3a'  2.775(4)  .  .  ?
   N3a  C2b  2.892(4)  .  .  ?
   N3a  N3b  2.887(4)  .  .  ?
   N3a  C4b  3.649(4)  .  .  ?
   N3a  N3b'  3.753(4)  .  .  ?
   N3a  C2c  3.341(4)  .  .  ?
   N3a  N3c  3.120(4)  .  .  ?
   N3a  C3c  3.545(4)  .  .  ?
   N3a  N3c'  4.061(4)  .  .  ?
   N3a  N1  3.559(4)  .  '2 756'  ?
   N3a  O11  3.362(4)  .  '2 756'  ?
   N3a  O13  2.972(4)  .  '2 756'  ?
   N3a  H2aA  2.07(4)  .  .  ?
   N3a  H2aB  2.02(4)  .  .  ?
   N3a  H4aA  2.10(4)  .  .  ?
   N3a  H4aB  2.05(3)  .  .  ?
   N3a  H4a'A  2.56(3)  .  .  ?
   N3a  H4a'B  3.27(4)  .  .  ?
   N3a  H3a'  3.14(4)  .  .  ?
   N3a  H2bB  2.86(3)  .  .  ?
   N3a  H4bB  3.31(3)  .  .  ?
   N3a  H3cA  3.36(3)  .  .  ?
   C4a  N3a'  2.433(4)  .  .  ?
   C4a  N4  3.670(9)  .  .  ?
   C4a  H2aB  2.43(4)  .  .  ?
   C4a  H3a  1.91(4)  .  .  ?
   C4a  H4a'A  1.97(3)  .  .  ?
   C4a  H4a'B  2.05(4)  .  .  ?
   C4a  H3a'  2.65(4)  .  .  ?
   C4a'  C2a'  2.462(5)  .  .  ?
   C4a'  H3a  2.60(4)  .  .  ?
   C4a'  H4aA  2.20(4)  .  .  ?
   C4a'  H4aB  2.07(3)  .  .  ?
   C4a'  H3a'  1.89(4)  .  .  ?
   C4a'  H2a'A  2.50(4)  .  .  ?
   N3a'  N3b  4.043(4)  .  .  ?
   N3a'  N3b'  3.045(4)  .  .  ?
   N3a'  C2b'  3.341(4)  .  .  ?
   N3a'  N3c  3.804(4)  .  .  ?
   N3a'  C4c'  3.676(4)  .  .  ?
   N3a'  N3c'  2.860(4)  .  .  ?
   N3a'  C2c'  2.843(4)  .  .  ?
   N3a'  C1'  2.523(4)  .  .  ?
   N3a'  N0'  3.746(4)  .  .  ?
   N3a'  N2  3.600(4)  .  '2 646'  ?
   N3a'  O21  3.211(4)  .  '2 646'  ?
   N3a'  O23  3.125(4)  .  '2 646'  ?
   N3a'  H3a  3.10(4)  .  .  ?
   N3a'  H4aB  2.66(3)  .  .  ?
   N3a'  H4a'A  1.93(3)  .  .  ?
   N3a'  H4a'B  2.06(4)  .  .  ?
   N3a'  H2a'A  1.97(4)  .  .  ?
   N3a'  H2a'B  2.02(4)  .  .  ?
   N3a'  H3b'  3.08(4)  .  .  ?
   N3a'  H3cB  3.37(4)  .  .  ?
   N3a'  H2c'A  2.80(3)  .  .  ?
   C2a'  N3b'  2.858(4)  .  .  ?
   C2a'  C2b'  2.545(4)  .  .  ?
   C2a'  N3c'  3.217(4)  .  .  ?
   C2a'  C2c'  2.548(5)  .  .  ?
   C2a'  N0'  2.450(4)  .  .  ?
   C2a'  H4a'A  2.53(3)  .  .  ?
   C2a'  H3a'  1.84(4)  .  .  ?
   C2a'  H2c'A  2.60(3)  .  .  ?
   C2a'  H0'A  2.58(4)  .  .  ?
   C2a'  H0'C  2.57(4)  .  .  ?
   C2b  C4b  2.423(5)  .  .  ?
   C2b  C2c  2.602(5)  .  .  ?
   C2b  N3c  3.300(4)  .  .  ?
   C2b  N1  3.614(4)  .  .  ?
   C2b  H0B  2.49(4)  .  .  ?
   C2b  H0C  2.57(4)  .  .  ?
   C2b  H3b  1.85(4)  .  .  ?
   C2b  H4bA  2.57(3)  .  .  ?
   C2b  H4bB  2.51(4)  .  .  ?
   C2b  H2cB  2.61(4)  .  .  ?
   N3b  C4b'  2.463(4)  .  .  ?
   N3b  N3b'  2.866(4)  .  .  ?
   N3b  C2c  3.098(4)  .  .  ?
   N3b  N3c  3.143(4)  .  .  ?
   N3b  C4c  3.478(4)  .  .  ?
   N3b  N3c'  3.210(4)  .  .  ?
   N3b  N1  3.549(4)  .  .  ?
   N3b  O11  3.181(4)  .  .  ?
   N3b  O12  3.116(4)  .  .  ?
   N3b  H3a  2.93(4)  .  .  ?
   N3b  H2bA  1.98(4)  .  .  ?
   N3b  H2bB  1.99(4)  .  .  ?
   N3b  H4bA  2.02(3)  .  .  ?
   N3b  H4bB  1.90(4)  .  .  ?
   N3b  H4b'A  2.65(4)  .  .  ?
   N3b  H4b'B  3.29(4)  .  .  ?
   N3b  H3b'  3.23(4)  .  .  ?
   N3b  H2cB  3.07(4)  .  .  ?
   N3b  H4cB  3.06(3)  .  .  ?
   N3b  H3c'  3.05(4)  .  .  ?
   C4b  N3b'  2.414(4)  .  .  ?
   C4b  H2bB  2.38(3)  .  .  ?
   C4b  H3b  1.84(4)  .  .  ?
   C4b  H4b'A  2.06(4)  .  .  ?
   C4b  H4b'B  2.04(4)  .  .  ?
   C4b  H3b'  2.63(4)  .  .  ?
   C4b'  C2b'  2.472(4)  .  .  ?
   C4b'  N3c'  3.547(4)  .  .  ?
   C4b'  H3b  2.58(4)  .  .  ?
   C4b'  H4bA  2.09(3)  .  .  ?
   C4b'  H4bB  1.95(4)  .  .  ?
   C4b'  H3b'  1.86(4)  .  .  ?
   C4b'  H2b'A  2.46(3)  .  .  ?
   N3b'  N3c'  2.967(4)  .  .  ?
   N3b'  C2c'  3.205(4)  .  .  ?
   N3b'  C1'  2.471(4)  .  .  ?
   N3b'  N0'  3.737(4)  .  .  ?
   N3b'  N2  3.773(4)  .  .  ?
   N3b'  O21  3.621(4)  .  .  ?
   N3b'  O22  3.089(4)  .  .  ?
   N3b'  H2a'A  2.65(3)  .  .  ?
   N3b'  H3b  3.14(4)  .  .  ?
   N3b'  H4bA  3.28(3)  .  .  ?
   N3b'  H4bB  2.52(4)  .  .  ?
   N3b'  H4b'A  2.05(4)  .  .  ?
   N3b'  H4b'B  2.02(4)  .  .  ?
   N3b'  H2b'A  1.94(4)  .  .  ?
   N3b'  H2b'B  2.03(3)  .  .  ?
   N3b'  H3c'  2.91(4)  .  .  ?
   C2b'  N3c'  2.998(4)  .  .  ?
   C2b'  C2c'  2.570(5)  .  .  ?
   C2b'  N0'  2.438(4)  .  .  ?
   C2b'  H2a'A  2.48(3)  .  .  ?
   C2b'  H4b'A  2.61(4)  .  .  ?
   C2b'  H3b'  1.79(4)  .  .  ?
   C2b'  H0'B  2.62(4)  .  .  ?
   C2b'  H0'C  2.56(3)  .  .  ?
   C2c  C3c  2.465(5)  .  .  ?
   C2c  C4c  2.463(5)  .  .  ?
   C2c  H0A  2.60(4)  .  .  ?
   C2c  H0C  2.54(4)  .  .  ?
   C2c  H2aB  2.65(4)  .  .  ?
   C2c  H3cA  2.63(3)  .  .  ?
   C2c  H4cB  2.55(3)  .  .  ?
   N3c  C31c  2.547(4)  .  .  ?
   N3c  O31c  2.916(4)  .  .  ?
   N3c  O32c  3.547(4)  .  .  ?
   N3c  C4c'  2.472(4)  .  .  ?
   N3c  N3c'  3.003(4)  .  .  ?
   N3c  H2aB  2.95(4)  .  .  ?
   N3c  H4aB  3.33(3)  .  .  ?
   N3c  H3b  3.10(4)  .  .  ?
   N3c  H2cA  1.99(3)  .  .  ?
   N3c  H2cB  1.97(4)  .  .  ?
   N3c  H3cA  2.07(3)  .  .  ?
   N3c  H3cB  1.95(4)  .  .  ?
   N3c  H4cA  2.04(4)  .  .  ?
   N3c  H4cB  2.00(3)  .  .  ?
   N3c  H4c'A  2.60(3)  .  .  ?
   N3c  H4c'B  3.31(4)  .  .  ?
   N3c  H3c'  3.31(4)  .  .  ?
   C3c  O31c  2.383(4)  .  .  ?
   C3c  O32c  2.389(4)  .  .  ?
   C3c  C4c  2.442(5)  .  .  ?
   C3c  H2cA  2.45(3)  .  .  ?
   C3c  H4cA  2.61(3)  .  .  ?
   C3c  H4c'A  2.68(4)  .  .  ?
   C31c  C4c  2.926(4)  .  .  ?
   C31c  H3cA  1.96(3)  .  .  ?
   C31c  H3cB  1.91(4)  .  .  ?
   C31c  H3ca  1.72(6)  .  .  ?
   C31c  H4cA  2.54(3)  .  .  ?
   O31c  O32c  2.242(4)  .  .  ?
   O31c  Cl  3.003(9)  .  '1 545'  ?
   O31c  O05  2.589(5)  .  '1 545'  ?
   O31c  H2cA  2.57(3)  .  .  ?
   O31c  H3cA  2.65(3)  .  .  ?
   O31c  H4cA  2.64(3)  .  .  ?
   O32c  N0'  2.835(4)  .  '2 646'  ?
   O32c  O05  2.859(6)  .  '1 545'  ?
   O32c  H2b'B  2.65(3)  .  '2 646'  ?
   O32c  H3cB  2.38(4)  .  .  ?
   O32c  H3ca  2.26(6)  .  .  ?
   O32c  H0'C  2.05(4)  .  '2 646'  ?
   C4c  N3c'  2.474(4)  .  .  ?
   C4c  H2cB  2.41(4)  .  .  ?
   C4c  H4c'A  2.03(3)  .  .  ?
   C4c  H4c'B  2.07(4)  .  .  ?
   C4c  H3c'  2.60(4)  .  .  ?
   C4c'  C2c'  2.428(4)  .  .  ?
   C4c'  O31  2.983(5)  .  .  ?
   C4c'  H4cA  2.05(3)  .  .  ?
   C4c'  H4cB  1.99(3)  .  .  ?
   C4c'  H3c'  1.81(4)  .  .  ?
   C4c'  H2c'A  2.47(3)  .  .  ?
   N3c'  C1'  2.533(4)  .  .  ?
   N3c'  N0'  3.767(4)  .  .  ?
   N3c'  N3  3.509(5)  .  .  ?
   N3c'  O31  3.006(5)  .  .  ?
   N3c'  O33  3.315(4)  .  .  ?
   N3c'  H3a'  2.80(4)  .  .  ?
   N3c'  H3b  3.03(4)  .  .  ?
   N3c'  H4b'A  3.24(4)  .  .  ?
   N3c'  H2b'A  2.99(4)  .  .  ?
   N3c'  H4cA  3.30(4)  .  .  ?
   N3c'  H4cB  2.59(3)  .  .  ?
   N3c'  H4c'A  1.98(3)  .  .  ?
   N3c'  H4c'B  2.00(4)  .  .  ?
   N3c'  H2c'A  2.01(3)  .  .  ?
   N3c'  H2c'B  2.02(3)  .  .  ?
   C2c'  N0'  2.414(4)  .  .  ?
   C2c'  H2b'A  2.62(3)  .  .  ?
   C2c'  H4c'A  2.52(3)  .  .  ?
   C2c'  H4c'B  2.63(4)  .  .  ?
   C2c'  H3c'  1.85(4)  .  .  ?
   C2c'  H0'A  2.52(4)  .  .  ?
   C2c'  H0'B  2.61(4)  .  .  ?
   C1'  H2a'A  2.00(4)  .  .  ?
   C1'  H2a'B  2.01(4)  .  .  ?
   C1'  H2b'A  1.99(3)  .  .  ?
   C1'  H2b'B  2.05(3)  .  .  ?
   C1'  H2c'A  2.04(3)  .  .  ?
   C1'  H2c'B  2.03(3)  .  .  ?
   C1'  H0'A  1.97(4)  .  .  ?
   C1'  H0'B  2.05(4)  .  .  ?
   C1'  H0'C  1.94(4)  .  .  ?
   N0'  N1  3.452(4)  .  '1 455'  ?
   N0'  O12  3.118(4)  .  '1 455'  ?
   N0'  O13  2.918(4)  .  '1 455'  ?
   N0'  N4  3.422(9)  .  '2 646'  ?
   N0'  O41  2.839(19)  .  '2 646'  ?
   N0'  O42  3.330(15)  .  '2 646'  ?
   N0'  Cl  3.478(7)  .  '2 646'  ?
   N0'  O02  3.443(9)  .  '2 646'  ?
   N0'  O03  2.74(2)  .  '2 646'  ?
   N0'  O05  2.850(6)  .  '2 646'  ?
   N0'  H2a'A  2.79(4)  .  .  ?
   N0'  H2a'B  2.39(4)  .  .  ?
   N0'  H2b'A  2.68(3)  .  .  ?
   N0'  H2b'B  2.48(3)  .  .  ?
   N0'  H2c'A  2.64(3)  .  .  ?
   N0'  H2c'B  2.43(3)  .  .  ?
   N1  N2  3.470(4)  .  '2 746'  ?
   N1  O22  3.666(5)  .  '2 746'  ?
   N1  O23  3.475(4)  .  '2 746'  ?
   N1  N3  4.258(5)  .  .  ?
   N1  Cl  3.720(6)  .  '2 746'  ?
   N1  O02  3.639(8)  .  '2 746'  ?
   N1  H3a  2.79(4)  .  '2 746'  ?
   N1  H2a'B  3.35(4)  .  '1 655'  ?
   N1  H2bA  2.93(4)  .  .  ?
   N1  H3b  2.97(4)  .  .  ?
   N1  H0'A  2.57(4)  .  '1 655'  ?
   O11  O12  2.165(4)  .  .  ?
   O11  O13  2.163(4)  .  .  ?
   O11  N3  3.672(5)  .  .  ?
   O11  H3a  2.59(4)  .  '2 746'  ?
   O11  H3b  2.51(4)  .  .  ?
   O11  H4cB  2.52(3)  .  .  ?
   O12  O13  2.133(4)  .  .  ?
   O12  Cl  3.046(6)  .  '2 746'  ?
   O12  H2bA  2.62(4)  .  .  ?
   O12  H3b  2.70(4)  .  .  ?
   O12  H4bA  2.45(3)  .  .  ?
   O12  H0'A  2.38(4)  .  '1 655'  ?
   O13  N2  3.293(4)  .  '2 746'  ?
   O13  H3a  2.30(4)  .  '2 746'  ?
   O13  H4aA  2.57(4)  .  '2 746'  ?
   O13  H4a'A  2.69(3)  .  '2 746'  ?
   O13  H2c'A  2.64(3)  .  '1 655'  ?
   O13  H0'A  2.05(4)  .  '1 655'  ?
   N2  N4  3.568(9)  .  '4 565'  ?
   N2  O42  3.448(14)  .  '4 565'  ?
   N2  Cl  3.775(6)  .  '4 565'  ?
   N2  O02  3.324(8)  .  '4 565'  ?
   N2  H0C  2.69(4)  .  '2 756'  ?
   N2  H3a'  2.92(4)  .  '2 656'  ?
   N2  H2a'B  3.31(4)  .  '2 656'  ?
   N2  H3b'  3.07(4)  .  .  ?
   O21  O22  2.173(4)  .  .  ?
   O21  O23  2.159(4)  .  .  ?
   O21  H3a'  2.45(4)  .  '2 656'  ?
   O21  H4c'A  2.63(3)  .  '2 656'  ?
   O21  H2c'A  2.68(3)  .  '2 656'  ?
   O22  O23  2.136(4)  .  .  ?
   O22  Cl  2.943(6)  .  '4 565'  ?
   O22  O02  2.969(9)  .  '4 565'  ?
   O22  H0C  2.37(4)  .  '2 756'  ?
   O22  H3b'  2.47(4)  .  .  ?
   O23  N4  3.343(8)  .  '4 565'  ?
   O23  H0C  2.29(4)  .  '2 756'  ?
   O23  H3a'  2.63(4)  .  '2 656'  ?
   O23  H2a'B  2.63(4)  .  '2 656'  ?
   N3  O43  3.581(16)  .  4  ?
   N3  O01  3.542(8)  .  '2 746'  ?
   N3  O04  2.94(3)  .  4  ?
   N3  H0A  2.87(4)  .  4  ?
   N3  H0B  2.65(4)  .  '2 746'  ?
   N3  H2aA  3.16(4)  .  '2 746'  ?
   N3  H2aB  2.89(4)  .  4  ?
   N3  H4b'A  3.16(4)  .  .  ?
   N3  H3c'  2.81(4)  .  .  ?
   O31  O32  2.070(6)  .  .  ?
   O31  O33  2.153(5)  .  .  ?
   O31  O04  2.77(3)  .  4  ?
   O31  H0B  2.00(4)  .  '2 746'  ?
   O31  H4c'B  2.44(4)  .  .  ?
   O31  H3c'  2.41(4)  .  .  ?
   O32  O32  2.907(8)  .  '3 757'  ?
   O32  O33  2.163(7)  .  .  ?
   O32  H0A  1.93(4)  .  4  ?
   O32  H0B  2.68(4)  .  '2 746'  ?
   O32  H2aA  2.45(4)  .  '2 746'  ?
   O33  H2aB  2.61(4)  .  4  ?
   O33  H4b'A  2.53(4)  .  .  ?
   O33  H2b'A  2.64(3)  .  .  ?
   O33  H3c'  2.65(4)  .  .  ?
   N4  O43  3.586(18)  .  '3 666'  ?
   N4  Cl  3.539(12)  .  .  ?
   N4  O02  2.017(12)  .  .  ?
   N4  O04  1.84(3)  .  .  ?
   N4  O05  3.576(10)  .  .  ?
   N4  H4aA  2.62(5)  .  .  ?
   N4  H4aB  3.16(3)  .  '3 666'  ?
   N4  H0'A  3.37(4)  .  '2 656'  ?
   N4  H0'B  2.66(4)  .  '2 656'  ?
   O41  O42  2.04(2)  .  .  ?
   O41  O43  2.20(2)  .  .  ?
   O41  O02  2.809(19)  .  .  ?
   O41  O04  2.80(3)  .  .  ?
   O41  H4aB  2.62(4)  .  '3 666'  ?
   O41  H0'B  1.93(5)  .  '2 656'  ?
   O42  O43  2.16(2)  .  .  ?
   O42  Cl  2.593(18)  .  .  ?
   O42  O03  2.31(2)  .  .  ?
   O42  O04  2.35(3)  .  .  ?
   O42  O05  2.837(18)  .  .  ?
   O43  O03  2.61(3)  .  .  ?
   O43  H4aA  2.70(5)  .  .  ?
   O43  H4a'B  2.66(4)  .  '3 666'  ?
   Cl  H4b'B  2.85(4)  .  '4 564'  ?
   Cl  H3ca  2.25(6)  .  '1 565'  ?
   O01  O02  2.232(10)  .  .  ?
   O01  O05  2.099(8)  .  .  ?
   O01  H2cA  2.59(3)  .  '3 766'  ?
   O02  O03  2.98(2)  .  .  ?
   O02  O05  2.166(9)  .  .  ?
   O02  H0A  2.50(4)  .  '3 766'  ?
   O02  H0C  2.52(4)  .  '3 766'  ?
   O03  H4aB  2.55(4)  .  '3 666'  ?
   O03  H0'B  1.79(5)  .  '2 656'  ?
   O05  H3ca  1.84(6)  .  '1 565'  ?
   O05  H0'C  2.37(4)  .  '2 656'  ?
   H0A  H0B  1.43(5)  .  .  ?
   H0A  H0C  1.46(6)  .  .  ?
   H0A  H2cA  2.28(5)  .  .  ?
   H0B  H0C  1.38(6)  .  .  ?
   H0B  H2aA  2.30(5)  .  .  ?
   H0C  H2bA  2.27(5)  .  .  ?
   H2aA  H2aB  1.53(5)  .  .  ?
   H2aA  H3a  2.15(5)  .  .  ?
   H2aB  H4aB  2.26(5)  .  .  ?
   H2aB  H3cA  2.35(5)  .  .  ?
   H3a  H4aA  2.25(6)  .  .  ?
   H4aA  H4aB  1.70(6)  .  .  ?
   H4aB  H4a'B  2.37(5)  .  .  ?
   H4a'A  H4a'B  1.52(5)  .  .  ?
   H4a'A  H2a'A  2.24(5)  .  .  ?
   H4a'B  H3a'  2.23(5)  .  .  ?
   H4a'B  H4c'B  2.36(5)  .  '2 656'  ?
   H3a'  H2a'B  2.07(6)  .  .  ?
   H2a'A  H2a'B  1.58(5)  .  .  ?
   H2a'B  H0'A  2.20(6)  .  .  ?
   H2bA  H2bB  1.52(5)  .  .  ?
   H2bA  H3b  2.06(6)  .  .  ?
   H2bB  H4bB  2.17(5)  .  .  ?
   H3b  H4bA  2.17(5)  .  .  ?
   H4bA  H4bB  1.45(5)  .  .  ?
   H4bA  H4b'B  2.37(5)  .  .  ?
   H4bA  H4cA  2.34(5)  .  '2 756'  ?
   H4bB  H4b'B  2.31(5)  .  .  ?
   H4b'A  H4b'B  1.58(5)  .  .  ?
   H4b'A  H2b'A  2.28(5)  .  .  ?
   H4b'B  H3b'  2.17(5)  .  .  ?
   H3b'  H2b'B  2.04(5)  .  .  ?
   H2b'A  H2b'B  1.50(5)  .  .  ?
   H2b'B  H0'C  2.28(5)  .  .  ?
   H2cA  H2cB  1.51(5)  .  .  ?
   H2cA  H3cA  2.39(4)  .  .  ?
   H2cB  H4cB  2.21(5)  .  .  ?
   H3cA  H3cB  1.38(6)  .  .  ?
   H3cB  H4c'A  2.31(5)  .  .  ?
   H4cA  H4cB  1.53(5)  .  .  ?
   H4cA  H4c'B  2.32(5)  .  .  ?
   H4cB  H4c'B  2.33(5)  .  .  ?
   H4c'A  H4c'B  1.57(5)  .  .  ?
   H4c'A  H2c'A  2.20(5)  .  .  ?
   H4c'B  H3c'  2.07(5)  .  .  ?
   H3c'  H2c'B  2.10(5)  .  .  ?
   H2c'A  H2c'B  1.49(4)  .  .  ?
   H2c'B  H0'B  2.29(5)  .  .  ?
   H0'A  H0'B  1.51(6)  .  .  ?
   H0'A  H0'C  1.40(5)  .  .  ?
   H0'B  H0'C  1.43(6)  .  .  ?
 
_atom_sites_solution_primary           ?
_atom_sites_solution_secondary         ?
_atom_sites_solution_hydrogens         ?
 
_geom_special_details                  ?
 
 
_cell_special_details
;      ?
;
 
_exptl_special_details
;      ?
;
 
_diffrn_special_details
;      ?
;
 
_chemical_compound_source              ?
_chemical_name_systematic              ?
_chemical_name_common                  ?
_chemical_formula_analytical           ?
_chemical_formula_structural           ?
 
_exptl_crystal_F_000                   ?
 
loop_
_diffrn_standard_refln_index_h
_diffrn_standard_refln_index_k
_diffrn_standard_refln_index_l
   ?  ?  ?
loop_
_diffrn_attenuator_code
_diffrn_attenuator_scale
   ?  ?
 
_reflns_limit_h_min                    -14
_reflns_limit_h_max                    14
_reflns_limit_k_min                    0
_reflns_limit_k_max                    14
_reflns_limit_l_min                    -26
_reflns_limit_l_max                    25
_reflns_number_observed                ?
_reflns_d_resolution_high              ?
_reflns_d_resolution_low               ?
 
_diffrn_reflns_av_sigmaI/netI          ?
_diffrn_reflns_theta_min               1.86
_diffrn_reflns_reduction_process       ?
 
_diffrn_ambient_temperature            293
_diffrn_radiation_source               'sealed tube'
_diffrn_radiation_monochromator        graphite
_diffrn_radiation_detector             'CCD area detector'
 
_refine_ls_extinction_expression       ?
_refine_ls_matrix_type                 full
_refine_ls_number_restraints           0
_refine_ls_number_constraints          0
_refine_ls_R_factor_all                .072
_refine_ls_wR_factor_all               .069
_refine_ls_goodness_of_fit_all         1.57
_refine_ls_shift/su_mean               .013
 
 
 
#==========================================================================
#       Structure Factor lists should be submitted as separate files
#==========================================================================
 
#data_<structure> # but for xtal use the refln data is needed in same block
 
loop_
_refln_index_h
_refln_index_k
_refln_index_l
_refln_F_meas
_refln_F_calc
_refln_F_sigma
_refln_F_squared_meas
_refln_F_squared_calc
_refln_F_squared_sigma
_refln_observed_status
_refln_F_meas_friedel
_refln_F_sigma_friedel
_refln_F_squared_meas_friedel
_refln_F_squared_sigma_friedel
                ?  ?  ?  ?  ?  ?  ?  ?  ?  ?  ?  ?  ?  ?
 
 
#===END

data_global
 
_audit_creation_method                 Xtal3.6
_audit_creation_date                   00-12-29
_audit_update_record                   ?
 
#==============================================================================
#   (Publishing Staff Use Only)
 
_journal_date_recd_electronic          ?
_journal_date_to_coeditor              ?
_journal_date_from_coeditor            ?
_journal_date_accepted                 ?
_journal_date_printers_first           ?
_journal_date_printers_final           ?
_journal_date_proofs_out               ?
_journal_date_proofs_in                ?
_journal_coeditor_name                 ?
_journal_coeditor_code                 ?
_journal_coeditor_notes
; ?
;
_journal_techeditor_code               ?
_journal_techeditor_notes
; ?
;
_journal_coden_ASTM                    ?
_journal_name_full                     ?
_journal_year                          ?
_journal_volume                        ?
_journal_issue                         ?
_journal_page_first                    ?
_journal_page_last                     ?
_journal_suppl_publ_number             ?
_journal_suppl_publ_pages              ?
 
#=======================================================================
 
# 1. SUBMISSION DETAILS
#----------------------
 
_publ_contact_author_name
      'Skelton, B. W.'
_publ_contact_author_address
;
    Department of Chemistry
    University of Western Australia
    35 Stirling Highway
    Crawley
    Western Australia 6009
    Australia
;
_publ_contact_author_email            bws@crystal.uwa.edu.au
_publ_contact_author_fax               (+61)_08_9380_1118
_publ_contact_author_phone             (+61)_08-9380_3481
 
_publ_contact_letter
;    ?                                      #<< contact letter
;
 
_publ_requested_journal     ?
_publ_requested_category     ?
 
_publ_section_title
;    ?                                      #<< paper title text
;
_publ_section_title_footnote
;    ?                                      #<< paper footnote text
;
 
loop_
_publ_author_name
_publ_author_footnote
_publ_author_address
 
 
'Skelton, Brian W.' .
; Department of Chemistry,
University of Western Australia,
35 Stirling Highway,
Crawley,
WA 6009,
Australia.
;
 
 
 
 
_publ_section_synopsis
;    ?                                     #<< synopsis if FI,CI,CM,CO papers
;
_publ_section_abstract
;    ?                                     #<< abstract text
;
_publ_section_comment
;    ?                                     #<< scientific commentary text
;
 
_publ_section_exptl_prep
;    ?                        #<< material & crystal preparation text
;
 
_publ_section_exptl_refinement
;    ?                        #<< crystallographic methods used
;
 
_publ_section_acknowledgements
;    ?                                     #<< acknowledgements text
;
 
_publ_section_references
;
  Sheldrick, G M. (1996). SADABS. Pogram for Empirical Absorption Correction
   of Area Detector Data.  University of Gottingen, Germany.
 
  Siemens (1995). SMART and SAINT. Area-Detector Control and Integration
  Software. Siemens Analytical X-ray Systems Inc., Madison, Wisconsin, USA.
 
  Hall, S.R., King, G.S.D., and Stewart., J.M. (1995).
  The Xtal 3.5 User's Manual.  University of Western Australia, Lamb: Perth.
;
_publ_section_figure_captions
;    ?                                     #<< figure captions
;
 
 
#=======================================================================
#  Data block for single structure (one for each study in the paper)
#=======================================================================
 
 
data_pd1221
 
 
# 2. EXPERIMENTAL DATA
#---------------------
 
 
_chemical_formula_sum                 'C20 H45 Cl3 Cu1 N8 O5'
_chemical_formula_moiety               ?
_chemical_formula_weight               647.54
_chemical_melting_point                ?
 
_symmetry_cell_setting                 monoclinic
_symmetry_space_group_name_H-M         P_1_21/n_1
_symmetry_space_group_name_Hall        -p_2yn
 
loop_
_symmetry_equiv_pos_as_xyz
   +x,+y,+z  1/2-x,1/2+y,1/2-z  -x,-y,-z  1/2+x,1/2-y,1/2+z
 
_cell_length_a                         9.8040(10)
_cell_length_b                         14.558(2)
_cell_length_c                         20.358(3)
_cell_angle_alpha                      90.00000
_cell_angle_beta                       103.913(2)
_cell_angle_gamma                      90.00000
_cell_volume                           2820.4(6)
_cell_formula_units_Z                  4
 
_exptl_crystal_density_diffrn          1.525
_exptl_crystal_density_meas            ?
_exptl_crystal_density_method          ?
_diffrn_radiation_type                'Mo K\a'
_diffrn_radiation_wavelength           .71073
 
_cell_measurement_reflns_used          7157
_cell_measurement_theta_min            2.8
_cell_measurement_theta_max            24.4
_cell_measurement_temperature          150
 
_exptl_absorpt_coefficient_mu          1.105
_exptl_crystal_description             bar
_exptl_crystal_size_max                .2
_exptl_crystal_size_mid                .07
_exptl_crystal_size_min                .06
_exptl_crystal_size_rad                ?
_exptl_crystal_colour                  blue
 
_diffrn_measurement_device_type
;
Bruker SMART CCD diffractometer
;
_diffrn_measurement_method             '\w scans'
_diffrn_detector_area_resol_mean       ?
 
_exptl_absorpt_correction_type         multi-scan
_exptl_absorpt_process_details
;
  SADABS; Sheldrick, 1996
;
_exptl_absorpt_correction_T_min        .70
_exptl_absorpt_correction_T_max        .84
 
_diffrn_reflns_number                  28169
_reflns_number_total                   7196
_reflns_Friedel_coverage               0
_reflns_number_gt                      5417
_reflns_threshold_expression          'F    > 4.00 sig(F   )'
 
_diffrn_reflns_theta_max               29.32
_diffrn_reflns_theta_full              ?
_diffrn_measured_fraction_theta_max    ?
_diffrn_measured_fraction_theta_full   ?
_diffrn_reflns_av_R_equivalents        .036
_diffrn_reflns_limit_h_min             -13
_diffrn_reflns_limit_h_max             12
_diffrn_reflns_limit_k_min             0
_diffrn_reflns_limit_k_max             19
_diffrn_reflns_limit_l_min             0
_diffrn_reflns_limit_l_max             27
_diffrn_standards_number               ?
_diffrn_standards_interval_count       ?
_diffrn_standards_interval_time        ?
_diffrn_standards_decay_%              0
 
 
_refine_ls_structure_factor_coef       F
_refine_ls_R_factor_gt                 .041
_refine_ls_wR_factor_ref               .046
_refine_ls_goodness_of_fit_ref         1.372
_refine_ls_number_reflns               5417
_refine_ls_number_parameters           498
_refine_ls_weighting_scheme            calc
_refine_ls_weighting_details           ?
_refine_ls_hydrogen_treatment          mixed
_refine_ls_shift/su_max                .038
_refine_diff_density_min               -.817
_refine_diff_density_max               1.217
 
_refine_ls_extinction_method           ?
_refine_ls_extinction_coef             ?
_refine_ls_abs_structure_details       ?
_refine_ls_abs_structure_Flack         ?
 
 
# 3. Information for the "methods" section
#-----------------------------------------
 
_computing_data_collection             'Siemens SMART (Siemens, 1995)'
_computing_cell_refinement             'Siemens SAINT (Siemens, 1995)'
_computing_data_reduction             'xtal ADDREF SORTRF'
_computing_structure_solution          xtal
_computing_structure_refinement       'xtal CRYLSQ'
_computing_molecular_graphics          xtal
_computing_publication_material       'xtal BONDLA CIFIO'
 
 
# 4. Supplementary data for validation and tables
#------------------------------------------------
 
loop_
_atom_type_symbol
_atom_type_description
_atom_type_oxidation_number
_atom_type_number_in_cell
_atom_type_scat_dispersion_real
_atom_type_scat_dispersion_imag
_atom_type_scat_source
   C  ?  0  80  .002  .002  'Int Tables Vol IV Tables 2.2B and 2.3.1'
   H  ?  0  180  0  0  'Int Tables Vol IV Tables 2.2B and 2.3.1'
   N  ?  0  32  .004  .003  'Int Tables Vol IV Tables 2.2B and 2.3.1'
   Cl  ?  0  12  .132  .159  'Int Tables Vol IV Tables 2.2B and 2.3.1'
   O  ?  0  20  .008  .006  'Int Tables Vol IV Tables 2.2B and 2.3.1'
   Cu  ?  0  4  .263   1.266  'Int Tables Vol IV Tables 2.2B and 2.3.1'
 
loop_
_atom_site_label
_atom_site_fract_x
_atom_site_fract_y
_atom_site_fract_z
_atom_site_U_iso_or_equiv
_atom_site_adp_type
_atom_site_calc_flag
_atom_site_calc_attached_atom
_atom_site_occupancy
_atom_site_disorder_assembly
_atom_site_disorder_group
   Cu  .64388(3)  .50422(2)  .294303(16)  .01574(14)  Uani  ?  ?  1.00000  ?  ?
   N0  .9360(3)  .30978(16)  .45158(12)  .0200(11)  Uani  ?  ?  1.00000  ?  ?
   C01  .9467(3)  .2123(2)  .43085(15)  .0235(13)  Uani  ?  ?  1.00000  ?  ?
   C02  .8077(3)  .16336(18)  .40774(13)  .0205(12)  Uani  ?  ?  1.00000  ?  ?
   O2  .8102(2)  .07921(12)  .40172(10)  .0263(10)  Uani  ?  ?  1.00000  ?  ?
   C1  .8209(3)  .36171(17)  .40322(13)  .0173(12)  Uani  ?  ?  1.00000  ?  ?
   C2a  .8575(3)  .35880(18)  .33295(13)  .0190(12)  Uani  ?  ?  1.00000  ?  ?
   N3a  .8243(2)  .44439(15)  .29231(11)  .0171(10)  Uani  ?  ?  1.00000  ?  ?
   C4a  .8228(3)  .4312(2)  .21940(13)  .0185(12)  Uani  ?  ?  1.00000  ?  ?
   C4a'  .6779(3)  .40328(18)  .17943(14)  .0190(12)  Uani  ?  ?  1.00000  ?  ?
   N3a'  .5742(2)  .46942(15)  .19564(11)  .0177(10)  Uani  ?  ?  1.00000  ?  ?
   C2a'  .4227(3)  .44451(19)  .17183(14)  .0192(12)  Uani  ?  ?  1.00000  ?  ?
   C2b  .8195(3)  .45849(18)  .43367(14)  .0187(12)  Uani  ?  ?  1.00000  ?  ?
   N3b  .7025(2)  .51677(16)  .39662(11)  .0173(10)  Uani  ?  ?  1.00000  ?  ?
   C4b  .5710(3)  .51714(19)  .42162(14)  .0200(13)  Uani  ?  ?  1.00000  ?  ?
   C4b'  .4603(3)  .56851(19)  .36957(14)  .0206(13)  Uani  ?  ?  1.00000  ?  ?
   N3b'  .4499(2)  .52823(15)  .30131(12)  .0175(10)  Uani  ?  ?  1.00000  ?  ?
   C2b'  .3536(3)  .44808(18)  .28643(14)  .0201(13)  Uani  ?  ?  1.00000  ?  ?
   C2c  .6849(3)  .31222(17)  .40534(14)  .0182(12)  Uani  ?  ?  1.00000  ?  ?
   N3c  .6880(2)  .21329(14)  .39351(11)  .0188(10)  Uani  ?  ?  1.00000  ?  ?
   C4c  .5523(3)  .1642(2)  .38071(15)  .0218(13)  Uani  ?  ?  1.00000  ?  ?
   C4c'  .4773(3)  .15426(18)  .30681(14)  .0211(13)  Uani  ?  ?  1.00000  ?  ?
   N3c'  .3882(2)  .23301(14)  .27848(11)  .0187(10)  Uani  ?  ?  1.00000  ?  ?
   C2c'  .4526(3)  .30174(18)  .24212(14)  .0178(12)  Uani  ?  ?  1.00000  ?  ?
   C1'  .3648(3)  .38945(18)  .22400(13)  .0177(12)  Uani  ?  ?  1.00000  ?  ?
   N0'  .2194(2)  .36297(16)  .18984(12)  .0215(11)  Uani  ?  ?  1.00000  ?  ?
   C01'  .1581(3)  .3040(2)  .23367(15)  .0231(13)  Uani  ?  ?  1.00000  ?  ?
   C02'  .2486(3)  .22753(18)  .27197(14)  .0211(12)  Uani  ?  ?  1.00000  ?  ?
   O2'  .1942(2)  .16398(13)  .29697(10)  .0279(10)  Uani  ?  ?  1.00000  ?  ?
   Cl1  .71157(7)  .66418(4)  .26993(3)  .0220(3)  Uani  ?  ?  1.00000  ?  ?
   Cl2  .23154(8)  .36511(6)  .42886(4)  .0324(4)  Uani  ?  ?  1.00000  ?  ?
   Cl3  .79649(9)  .27778(5)  .57231(4)  .0337(4)  Uani  ?  ?  1.00000  ?  ?
   O01  .0746(2)  .54028(16)  .35332(13)  .0426(13)  Uani  ?  ?  1.00000  ?  ?
   O02  .8519(3)  .69669(17)  .42384(12)  .0569(15)  Uani  ?  ?  1.00000  ?  ?
   O101  .8806(6)  .2795(3)  .0502(2)  .102(3)  Uani  ?  ?  1.00000  ?  ?
   C101  .9245(5)  .3713(3)  .0394(2)  .058(2)  Uani  ?  ?  1.00000  ?  ?
   C102  .8137(5)  .4183(3)  -.0116(2)  .056(3)  Uani  ?  ?  1.00000  ?  ?
   H0A  1.015(3)  .336(2)  .4525(15)  .021(8)  Uiso  ?  ?  1.00000  ?  ?
   H0B  .913(3)  .311(2)  .4912(18)  .036(9)  Uiso  ?  ?  1.00000  ?  ?
   H01A  .011(3)  .182(2)  .4726(17)  .030(8)  Uiso  ?  ?  1.00000  ?  ?
   H01B  -.006(3)  .211(2)  .3936(16)  .033(9)  Uiso  ?  ?  1.00000  ?  ?
   H2aA  .804(3)  .309(2)  .3072(15)  .026(8)  Uiso  ?  ?  1.00000  ?  ?
   H2aB  .961(3)  .3459(18)  .3411(14)  .019(7)  Uiso  ?  ?  1.00000  ?  ?
   H3a  .893(3)  .487(2)  .3085(15)  .022(8)  Uiso  ?  ?  1.00000  ?  ?
   H4aA  .894(3)  .387(2)  .2155(13)  .017(7)  Uiso  ?  ?  1.00000  ?  ?
   H4aB  .849(3)  .4919(18)  .2037(13)  .014(7)  Uiso  ?  ?  1.00000  ?  ?
   H4a'A  .655(3)  .340(2)  .1926(14)  .021(7)  Uiso  ?  ?  1.00000  ?  ?
   H4a'B  .675(2)  .4065(16)  .1303(13)  .006(6)  Uiso  ?  ?  1.00000  ?  ?
   H3a'  .586(3)  .5227(18)  .1808(13)  .009(7)  Uiso  ?  ?  1.00000  ?  ?
   H2a'A  .409(3)  .4081(18)  .1293(13)  .011(6)  Uiso  ?  ?  1.00000  ?  ?
   H2a'B  .372(3)  .5014(18)  .1605(14)  .013(7)  Uiso  ?  ?  1.00000  ?  ?
   H2bA  .906(3)  .4885(17)  .4336(13)  .012(7)  Uiso  ?  ?  1.00000  ?  ?
   H2bB  .816(3)  .4489(18)  .4817(14)  .017(7)  Uiso  ?  ?  1.00000  ?  ?
   H3b  .730(3)  .566(2)  .4007(15)  .020(8)  Uiso  ?  ?  1.00000  ?  ?
   H4bA  .593(3)  .5450(18)  .4659(14)  .013(7)  Uiso  ?  ?  1.00000  ?  ?
   H4bB  .539(3)  .4533(19)  .4255(13)  .013(7)  Uiso  ?  ?  1.00000  ?  ?
   H4b'A  .490(3)  .636(2)  .3678(15)  .031(8)  Uiso  ?  ?  1.00000  ?  ?
   H4b'B  .372(3)  .5654(19)  .3797(14)  .020(7)  Uiso  ?  ?  1.00000  ?  ?
   H3b'  .414(3)  .567(2)  .2724(15)  .017(8)  Uiso  ?  ?  1.00000  ?  ?
   H2b'A  .258(3)  .4720(18)  .2783(14)  .015(7)  Uiso  ?  ?  1.00000  ?  ?
   H2b'B  .376(3)  .409(2)  .3324(15)  .028(8)  Uiso  ?  ?  1.00000  ?  ?
   H2cA  .607(3)  .3385(19)  .3690(14)  .020(7)  Uiso  ?  ?  1.00000  ?  ?
   H2cB  .667(3)  .3206(19)  .4494(15)  .020(7)  Uiso  ?  ?  1.00000  ?  ?
   H4cA  .496(3)  .195(2)  .4006(15)  .022(8)  Uiso  ?  ?  1.00000  ?  ?
   H4cB  .568(3)  .105(2)  .3971(14)  .021(7)  Uiso  ?  ?  1.00000  ?  ?
   H4c'A  .414(3)  .1003(19)  .3026(13)  .016(7)  Uiso  ?  ?  1.00000  ?  ?
   H4c'B  .548(3)  .1435(19)  .2775(14)  .021(7)  Uiso  ?  ?  1.00000  ?  ?
   H2c'A  .463(3)  .2747(18)  .1994(14)  .016(7)  Uiso  ?  ?  1.00000  ?  ?
   H2c'B  .549(3)  .3194(17)  .2718(13)  .010(6)  Uiso  ?  ?  1.00000  ?  ?
   H0'  .227(3)  .330(2)  .1567(17)  .037(10)  Uiso  ?  ?  1.00000  ?  ?
   H01'A  .129(3)  .338(2)  .2705(16)  .025(8)  Uiso  ?  ?  1.00000  ?  ?
   H01'B  .073(3)  .275(2)  .2060(15)  .026(8)  Uiso  ?  ?  1.00000  ?  ?
   H01a  1.09933  .59941  .36758  .06300  Uiso  ?  ?  1.00000  ?  ?
   H01b  1.13542  .49935  .37135  .06300  Uiso  ?  ?  1.00000  ?  ?
   H02a  .77768  .72427  .43145  .08400  Uiso  ?  ?  1.00000  ?  ?
   H02b  .82273  .70929  .38144  .08400  Uiso  ?  ?  1.00000  ?  ?
   H101  .882(7)  .242(5)  .016(3)  .14(3)  Uiso  ?  ?  1.00000  ?  ?
   H101A  .969(4)  .425(2)  .0899(18)  .054(11)  Uiso  ?  ?  1.00000  ?  ?
   H101B  1.014(4)  .371(3)  .023(2)  .059(12)  Uiso  ?  ?  1.00000  ?  ?
   H102A  .844(5)  .480(3)  -.020(2)  .081(15)  Uiso  ?  ?  1.00000  ?  ?
   H102B  .789(4)  .391(2)  -.0574(19)  .043(10)  Uiso  ?  ?  1.00000  ?  ?
   H102C  .715(5)  .433(3)  -.002(2)  .078(14)  Uiso  ?  ?  1.00000  ?  ?
 
loop_
_atom_site_aniso_label
_atom_site_aniso_U_11
_atom_site_aniso_U_22
_atom_site_aniso_U_33
_atom_site_aniso_U_12
_atom_site_aniso_U_13
_atom_site_aniso_U_23
   Cu  .01572(16)  .01603(16)  .01560(16)  .00094(13)  .00401(11)  -.00050(12)
   N0  .0205(13)  .0194(12)  .0184(13)  .0007(10)  .0014(10)  .0004(9)
   C01  .0226(15)  .0220(14)  .0242(15)  .0023(11)  .0023(12)  -.0013(12)
   C02  .0253(15)  .0215(13)  .0142(13)  .0030(11)  .0035(11)  .0021(10)
   O2  .0329(11)  .0170(10)  .0280(11)  .0024(8)  .0055(9)  -.0006(8)
   C1  .0172(13)  .0181(12)  .0154(13)  .0016(10)  .0015(10)  .0012(10)
   C2a  .0218(14)  .0189(13)  .0163(13)  .0028(11)  .0048(11)  .0000(10)
   N3a  .0165(11)  .0178(11)  .0169(11)  -.0005(9)  .0035(9)  -.0004(9)
   C4a  .0186(13)  .0218(14)  .0164(13)  .0025(11)  .0066(11)  .0007(11)
   C4a'  .0210(14)  .0197(13)  .0177(14)  .0017(11)  .0073(11)  -.0001(10)
   N3a'  .0189(12)  .0150(11)  .0189(12)  .0003(9)  .0041(9)  .0008(9)
   C2a'  .0182(13)  .0190(13)  .0188(14)  .0004(11)  .0015(11)  .0001(11)
   C2b  .0192(14)  .0181(13)  .0171(14)  -.0010(11)  .0011(11)  -.0019(10)
   N3b  .0179(11)  .0160(12)  .0180(11)  -.0013(9)  .0043(9)  -.0008(9)
   C4b  .0222(14)  .0209(14)  .0182(14)  -.0007(11)  .0077(11)  -.0036(11)
   C4b'  .0211(14)  .0187(13)  .0234(14)  .0002(11)  .0081(11)  -.0050(11)
   N3b'  .0185(12)  .0157(11)  .0177(12)  .0011(9)  .0035(9)  -.0011(9)
   C2b'  .0167(14)  .0196(14)  .0248(15)  -.0010(11)  .0067(11)  -.0042(11)
   C2c  .0203(14)  .0163(13)  .0163(13)  .0024(10)  .0014(11)  -.0004(10)
   N3c  .0210(12)  .0163(11)  .0183(11)  -.0003(9)  .0032(9)  .0008(9)
   C4c  .0261(15)  .0165(13)  .0244(15)  -.0003(11)  .0090(12)  .0022(11)
   C4c'  .0211(14)  .0163(13)  .0246(15)  -.0003(11)  .0033(11)  -.0001(11)
   N3c'  .0175(11)  .0161(11)  .0225(12)  -.0001(9)  .0046(9)  .0015(9)
   C2c'  .0175(13)  .0174(13)  .0182(13)  -.0011(10)  .0037(11)  -.0003(10)
   C1'  .0153(13)  .0172(13)  .0197(13)  -.0009(10)  .0022(10)  -.0016(10)
   N0'  .0169(12)  .0237(12)  .0216(13)  -.0016(9)  .0003(10)  -.0034(10)
   C01'  .0165(14)  .0229(14)  .0285(16)  -.0023(11)  .0029(12)  -.0031(12)
   C02'  .0193(14)  .0199(13)  .0240(14)  -.0036(11)  .0049(11)  -.0055(11)
   O2'  .0248(11)  .0241(10)  .0350(12)  -.0082(8)  .0076(9)  -.0002(9)
   Cl1  .0273(4)  .0152(3)  .0231(3)  -.0037(3)  .0053(3)  .0034(2)
   Cl2  .0249(4)  .0496(5)  .0223(4)  -.0125(3)  .0051(3)  -.0035(3)
   Cl3  .0518(5)  .0311(4)  .0187(4)  .0059(3)  .0097(3)  .0067(3)
   O01  .0256(12)  .0411(13)  .0574(16)  -.0046(10)  .0028(11)  -.0086(12)
   O02  .080(2)  .0422(14)  .0350(14)  -.0157(14)  -.0130(13)  .0082(12)
   O101  .194(5)  .058(2)  .064(2)  -.001(3)  .050(3)  .0040(19)
   C101  .069(3)  .062(3)  .045(2)  -.006(2)  .018(2)  .001(2)
   C102  .053(3)  .058(3)  .057(3)  -.003(2)  .012(2)  -.011(2)
 
 
# 5. Molecular Geometry
#----------------------
 
loop_
_geom_bond_atom_site_label_1
_geom_bond_atom_site_label_2
_geom_bond_site_symmetry_1
_geom_bond_site_symmetry_2
_geom_bond_distance
_geom_bond_publ_flag                 #<< enter YES for value to be published
   Cu  N3a  .  .  1.981(2)  ?
   Cu  N3a'  .  .  2.024(2)  ?
   Cu  N3b  .  .  2.031(2)  ?
   Cu  N3b'  .  .  1.972(2)  ?
   Cu  Cl1  .  .  2.5036(8)  ?
   N0  C01  .  .  1.491(4)  ?
   N0  C1  .  .  1.510(3)  ?
   N0  H0A  .  .  .86(3)  ?
   N0  H0B  .  .  .89(4)  ?
   C01  C02  .  .  1.510(4)  ?
   C01  H01A  .  '1 655'  1.03(3)  ?
   C01  H01B  .  '1 655'  .98(4)  ?
   C02  O2  .  .  1.232(3)  ?
   C02  N3c  .  .  1.351(3)  ?
   C1  C2a  .  .  1.557(4)  ?
   C1  C2b  .  .  1.541(4)  ?
   C1  C2c  .  .  1.526(4)  ?
   C2a  N3a  .  .  1.488(3)  ?
   C2a  H2aA  .  .  .97(3)  ?
   C2a  H2aB  .  .  1.01(3)  ?
   N3a  C4a  .  .  1.493(4)  ?
   N3a  H3a  .  .  .92(3)  ?
   C4a  C4a'  .  .  1.513(3)  ?
   C4a  H4aA  .  .  .97(3)  ?
   C4a  H4aB  .  .  .99(3)  ?
   C4a'  N3a'  .  .  1.493(4)  ?
   C4a'  H4a'A  .  .  1.00(3)  ?
   C4a'  H4a'B  .  .  .99(3)  ?
   N3a'  C2a'  .  .  1.492(3)  ?
   N3a'  H3a'  .  .  .85(3)  ?
   C2a'  C1'  .  .  1.543(4)  ?
   C2a'  H2a'A  .  .  1.00(3)  ?
   C2a'  H2a'B  .  .  .96(3)  ?
   C2b  N3b  .  .  1.479(3)  ?
   C2b  H2bA  .  .  .95(3)  ?
   C2b  H2bB  .  .  1.00(3)  ?
   N3b  C4b  .  .  1.495(4)  ?
   N3b  H3b  .  .  .76(3)  ?
   C4b  C4b'  .  .  1.519(4)  ?
   C4b  H4bA  .  .  .96(3)  ?
   C4b  H4bB  .  .  .99(3)  ?
   C4b'  N3b'  .  .  1.489(4)  ?
   C4b'  H4b'A  .  .  1.03(3)  ?
   C4b'  H4b'B  .  .  .94(3)  ?
   N3b'  C2b'  .  .  1.486(3)  ?
   N3b'  H3b'  .  .  .83(3)  ?
   C2b'  C1'  .  .  1.557(4)  ?
   C2b'  H2b'A  .  .  .98(3)  ?
   C2b'  H2b'B  .  .  1.07(3)  ?
   C2c  N3c  .  .  1.462(3)  ?
   C2c  H2cA  .  .  1.00(3)  ?
   C2c  H2cB  .  .  .96(3)  ?
   N3c  C4c  .  .  1.477(4)  ?
   C4c  C4c'  .  .  1.514(4)  ?
   C4c  H4cA  .  .  .89(3)  ?
   C4c  H4cB  .  .  .93(3)  ?
   C4c'  N3c'  .  .  1.472(3)  ?
   C4c'  H4c'A  .  .  .99(3)  ?
   C4c'  H4c'B  .  .  1.03(3)  ?
   N3c'  C2c'  .  .  1.474(4)  ?
   N3c'  C02'  .  .  1.346(4)  ?
   C2c'  C1'  .  .  1.535(4)  ?
   C2c'  H2c'A  .  .  .98(3)  ?
   C2c'  H2c'B  .  .  1.03(2)  ?
   C1'  N0'  .  .  1.479(3)  ?
   N0'  C01'  .  .  1.467(4)  ?
   N0'  H0'  .  .  .85(4)  ?
   C01'  C02'  .  .  1.517(4)  ?
   C01'  H01'A  .  .  1.00(3)  ?
   C01'  H01'B  .  .  .98(3)  ?
   C02'  O2'  .  .  1.237(4)  ?
   O01  H01a  .  '1 455'  .922(2)  ?
   O01  H01b  .  '1 455'  .860(2)  ?
   O02  H02a  .  .  .877(3)  ?
   O02  H02b  .  .  .861(2)  ?
   O101  C101  .  .  1.437(6)  ?
   O101  H101  .  .  .89(7)  ?
   C101  C102  .  .  1.477(6)  ?
   C101  H101A  .  .  1.29(4)  ?
   C101  H101B  .  .  1.01(4)  ?
   C102  H102A  .  .  .98(5)  ?
   C102  H102B  .  .  .99(4)  ?
   C102  H102C  .  .  1.06(5)  ?
 
loop_
_geom_angle_atom_site_label_1
_geom_angle_atom_site_label_2
_geom_angle_atom_site_label_3
_geom_angle_site_symmetry_1
_geom_angle_site_symmetry_2
_geom_angle_site_symmetry_3
_geom_angle
_geom_angle_publ_flag                #<< enter YES for value to be published
   N3a  Cu  N3a'  .  .  .  87.68(9)  ?
   N3a  Cu  N3b  .  .  .  91.54(9)  ?
   N3a  Cu  N3b'  .  .  .  163.90(9)  ?
   N3a  Cu  Cl1  .  .  .  97.15(7)  ?
   N3a'  Cu  N3b  .  .  .  169.96(10)  ?
   N3a'  Cu  N3b'  .  .  .  90.86(9)  ?
   N3a'  Cu  Cl1  .  .  .  94.49(7)  ?
   N3b  Cu  N3b'  .  .  .  87.12(10)  ?
   N3b  Cu  Cl1  .  .  .  95.54(7)  ?
   N3b'  Cu  Cl1  .  .  .  98.95(7)  ?
   C01  N0  C1  .  .  .  112.6(2)  ?
   C01  N0  H0A  .  .  .  108(2)  ?
   C01  N0  H0B  .  .  .  109(2)  ?
   C1  N0  H0A  .  .  .  108.8(18)  ?
   C1  N0  H0B  .  .  .  106(2)  ?
   H0A  N0  H0B  .  .  .  113(3)  ?
   N0  C01  C02  .  .  .  114.7(2)  ?
   N0  C01  H01A  .  .  '1 655'  104.1(17)  ?
   N0  C01  H01B  .  .  '1 655'  108.5(18)  ?
   C02  C01  H01A  .  .  '1 655'  112.4(18)  ?
   C02  C01  H01B  .  .  '1 655'  108.0(17)  ?
   H01A  C01  H01B  '1 655'  .  '1 655'  109(3)  ?
   C01  C02  O2  .  .  .  117.5(2)  ?
   C01  C02  N3c  .  .  .  119.0(2)  ?
   O2  C02  N3c  .  .  .  123.4(2)  ?
   N0  C1  C2a  .  .  .  106.5(2)  ?
   N0  C1  C2b  .  .  .  105.86(19)  ?
   N0  C1  C2c  .  .  .  105.5(2)  ?
   C2a  C1  C2b  .  .  .  114.9(2)  ?
   C2a  C1  C2c  .  .  .  114.2(2)  ?
   C2b  C1  C2c  .  .  .  109.1(2)  ?
   C1  C2a  N3a  .  .  .  114.8(2)  ?
   C1  C2a  H2aA  .  .  .  108(2)  ?
   C1  C2a  H2aB  .  .  .  107.5(16)  ?
   N3a  C2a  H2aA  .  .  .  107.8(17)  ?
   N3a  C2a  H2aB  .  .  .  109.0(16)  ?
   H2aA  C2a  H2aB  .  .  .  110(2)  ?
   Cu  N3a  C2a  .  .  .  115.73(19)  ?
   Cu  N3a  C4a  .  .  .  106.35(15)  ?
   Cu  N3a  H3a  .  .  .  106(2)  ?
   C2a  N3a  C4a  .  .  .  113.2(2)  ?
   C2a  N3a  H3a  .  .  .  108.9(17)  ?
   C4a  N3a  H3a  .  .  .  106(2)  ?
   N3a  C4a  C4a'  .  .  .  110.6(2)  ?
   N3a  C4a  H4aA  .  .  .  109.4(16)  ?
   N3a  C4a  H4aB  .  .  .  105.3(16)  ?
   C4a'  C4a  H4aA  .  .  .  112.3(15)  ?
   C4a'  C4a  H4aB  .  .  .  110.2(14)  ?
   H4aA  C4a  H4aB  .  .  .  109(2)  ?
   C4a  C4a'  N3a'  .  .  .  108.0(2)  ?
   C4a  C4a'  H4a'A  .  .  .  110.2(14)  ?
   C4a  C4a'  H4a'B  .  .  .  108.8(14)  ?
   N3a'  C4a'  H4a'A  .  .  .  109.1(18)  ?
   N3a'  C4a'  H4a'B  .  .  .  109.7(14)  ?
   H4a'A  C4a'  H4a'B  .  .  .  111(2)  ?
   Cu  N3a'  C4a'  .  .  .  107.18(15)  ?
   Cu  N3a'  C2a'  .  .  .  117.07(18)  ?
   Cu  N3a'  H3a'  .  .  .  94.7(17)  ?
   C4a'  N3a'  C2a'  .  .  .  116.7(2)  ?
   C4a'  N3a'  H3a'  .  .  .  111(2)  ?
   C2a'  N3a'  H3a'  .  .  .  108.4(17)  ?
   N3a'  C2a'  C1'  .  .  .  113.9(2)  ?
   N3a'  C2a'  H2a'A  .  .  .  109.1(15)  ?
   N3a'  C2a'  H2a'B  .  .  .  106.4(16)  ?
   C1'  C2a'  H2a'A  .  .  .  109.1(16)  ?
   C1'  C2a'  H2a'B  .  .  .  111.0(18)  ?
   H2a'A  C2a'  H2a'B  .  .  .  107(2)  ?
   C1  C2b  N3b  .  .  .  113.6(2)  ?
   C1  C2b  H2bA  .  .  .  108.9(17)  ?
   C1  C2b  H2bB  .  .  .  105.8(15)  ?
   N3b  C2b  H2bA  .  .  .  108.6(15)  ?
   N3b  C2b  H2bB  .  .  .  112.1(16)  ?
   H2bA  C2b  H2bB  .  .  .  108(2)  ?
   Cu  N3b  C2b  .  .  .  117.68(18)  ?
   Cu  N3b  C4b  .  .  .  107.16(15)  ?
   Cu  N3b  H3b  .  .  .  102(2)  ?
   C2b  N3b  C4b  .  .  .  117.1(2)  ?
   C2b  N3b  H3b  .  .  .  106(2)  ?
   C4b  N3b  H3b  .  .  .  106(3)  ?
   N3b  C4b  C4b'  .  .  .  107.1(2)  ?
   N3b  C4b  H4bA  .  .  .  107.5(16)  ?
   N3b  C4b  H4bB  .  .  .  109.8(16)  ?
   C4b'  C4b  H4bA  .  .  .  114.1(15)  ?
   C4b'  C4b  H4bB  .  .  .  109.4(13)  ?
   H4bA  C4b  H4bB  .  .  .  109(2)  ?
   C4b  C4b'  N3b'  .  .  .  109.5(2)  ?
   C4b  C4b'  H4b'A  .  .  .  109.5(15)  ?
   C4b  C4b'  H4b'B  .  .  .  111.4(16)  ?
   N3b'  C4b'  H4b'A  .  .  .  107.4(18)  ?
   N3b'  C4b'  H4b'B  .  .  .  109.0(16)  ?
   H4b'A  C4b'  H4b'B  .  .  .  110(3)  ?
   Cu  N3b'  C4b'  .  .  .  106.65(16)  ?
   Cu  N3b'  C2b'  .  .  .  115.01(17)  ?
   Cu  N3b'  H3b'  .  .  .  108(2)  ?
   C4b'  N3b'  C2b'  .  .  .  113.4(2)  ?
   C4b'  N3b'  H3b'  .  .  .  108(2)  ?
   C2b'  N3b'  H3b'  .  .  .  104.7(19)  ?
   N3b'  C2b'  C1'  .  .  .  115.5(2)  ?
   N3b'  C2b'  H2b'A  .  .  .  107.0(15)  ?
   N3b'  C2b'  H2b'B  .  .  .  104.8(15)  ?
   C1'  C2b'  H2b'A  .  .  .  108.1(16)  ?
   C1'  C2b'  H2b'B  .  .  .  112.3(17)  ?
   H2b'A  C2b'  H2b'B  .  .  .  109(2)  ?
   C1  C2c  N3c  .  .  .  114.0(2)  ?
   C1  C2c  H2cA  .  .  .  108.3(17)  ?
   C1  C2c  H2cB  .  .  .  109.0(16)  ?
   N3c  C2c  H2cA  .  .  .  107.2(16)  ?
   N3c  C2c  H2cB  .  .  .  107.1(16)  ?
   H2cA  C2c  H2cB  .  .  .  111(2)  ?
   C02  N3c  C2c  .  .  .  123.1(2)  ?
   C02  N3c  C4c  .  .  .  118.5(2)  ?
   C2c  N3c  C4c  .  .  .  116.8(2)  ?
   N3c  C4c  C4c'  .  .  .  115.0(3)  ?
   N3c  C4c  H4cA  .  .  .  108.0(18)  ?
   N3c  C4c  H4cB  .  .  .  108.8(17)  ?
   C4c'  C4c  H4cA  .  .  .  107.1(17)  ?
   C4c'  C4c  H4cB  .  .  .  105.5(17)  ?
   H4cA  C4c  H4cB  .  .  .  112(3)  ?
   C4c  C4c'  N3c'  .  .  .  114.5(2)  ?
   C4c  C4c'  H4c'A  .  .  .  107.8(15)  ?
   C4c  C4c'  H4c'B  .  .  .  110.9(14)  ?
   N3c'  C4c'  H4c'A  .  .  .  106.4(15)  ?
   N3c'  C4c'  H4c'B  .  .  .  108.1(15)  ?
   H4c'A  C4c'  H4c'B  .  .  .  109(2)  ?
   C4c'  N3c'  C2c'  .  .  .  116.1(2)  ?
   C4c'  N3c'  C02'  .  .  .  119.1(2)  ?
   C2c'  N3c'  C02'  .  .  .  122.6(2)  ?
   N3c'  C2c'  C1'  .  .  .  113.7(2)  ?
   N3c'  C2c'  H2c'A  .  .  .  108.6(16)  ?
   N3c'  C2c'  H2c'B  .  .  .  108.8(15)  ?
   C1'  C2c'  H2c'A  .  .  .  106.9(15)  ?
   C1'  C2c'  H2c'B  .  .  .  108.6(14)  ?
   H2c'A  C2c'  H2c'B  .  .  .  110(2)  ?
   C2a'  C1'  C2b'  .  .  .  112.8(2)  ?
   C2a'  C1'  C2c'  .  .  .  108.6(2)  ?
   C2a'  C1'  N0'  .  .  .  106.5(2)  ?
   C2b'  C1'  C2c'  .  .  .  113.9(2)  ?
   C2b'  C1'  N0'  .  .  .  106.1(2)  ?
   C2c'  C1'  N0'  .  .  .  108.5(2)  ?
   C1'  N0'  C01'  .  .  .  110.9(2)  ?
   C1'  N0'  H0'  .  .  .  105(2)  ?
   C01'  N0'  H0'  .  .  .  106(2)  ?
   N0'  C01'  C02'  .  .  .  117.9(2)  ?
   N0'  C01'  H01'A  .  .  .  113.4(18)  ?
   N0'  C01'  H01'B  .  .  .  108.5(19)  ?
   C02'  C01'  H01'A  .  .  .  102.6(16)  ?
   C02'  C01'  H01'B  .  .  .  107.0(17)  ?
   H01'A  C01'  H01'B  .  .  .  107(3)  ?
   N3c'  C02'  C01'  .  .  .  117.6(2)  ?
   N3c'  C02'  O2'  .  .  .  122.2(2)  ?
   C01'  C02'  O2'  .  .  .  120.2(2)  ?
   H01a  O01  H01b  '1 455'  .  '1 455'  114.2(2)  ?
   H02a  O02  H02b  .  .  .  89.4(2)  ?
   C101  O101  H101  .  .  .  113(4)  ?
   O101  C101  C102  .  .  .  110.0(4)  ?
   O101  C101  H101A  .  .  .  120.2(17)  ?
   O101  C101  H101B  .  .  .  111(2)  ?
   C102  C101  H101A  .  .  .  109.3(16)  ?
   C102  C101  H101B  .  .  .  109(2)  ?
   H101A  C101  H101B  .  .  .  96(3)  ?
   C101  C102  H102A  .  .  .  110(3)  ?
   C101  C102  H102B  .  .  .  117(2)  ?
   C101  C102  H102C  .  .  .  121(2)  ?
   H102A  C102  H102B  .  .  .  103(4)  ?
   H102A  C102  H102C  .  .  .  100(4)  ?
   H102B  C102  H102C  .  .  .  103(3)  ?
 
loop_
_geom_torsion_atom_site_label_1
_geom_torsion_atom_site_label_2
_geom_torsion_atom_site_label_3
_geom_torsion_atom_site_label_4
_geom_torsion_site_symmetry_1
_geom_torsion_site_symmetry_2
_geom_torsion_site_symmetry_3
_geom_torsion_site_symmetry_4
_geom_torsion
_geom_torsion_publ_flag              #<< enter YES for value to be published
      ?  ?  ?  ?  ?  ?  ?  ?  ?  ?
 
loop_
_geom_hbond_atom_site_label_D
_geom_hbond_atom_site_label_H
_geom_hbond_atom_site_label_A
_geom_hbond_site_symmetry_D
_geom_hbond_site_symmetry_H
_geom_hbond_site_symmetry_A
_geom_hbond_distance_DH
_geom_hbond_distance_HA
_geom_hbond_distance_DA
_geom_hbond_angle_DHA
_geom_hbond_publ_flag               #<< enter YES for value to be published
       ?  ?  ?  ?  ?  ?  ?  ?  ?  ?  ?
 
 
#--------------------------------------------------------------------------
#      Special items requested by author for inclusion in paper
#--------------------------------------------------------------------------
 
loop_
_publ_manuscript_incl_extra_item
_publ_manuscript_incl_extra_defn
                        ?  ?
 
#--------------------------------------------------------------------------
#       Items which are non-mandatory for Acta C submissions
#--------------------------------------------------------------------------
 
loop_
_geom_contact_atom_site_label_1
_geom_contact_atom_site_label_2
_geom_contact_distance
_geom_contact_site_symmetry_1
_geom_contact_site_symmetry_2
_geom_contact_publ_flag
   Cu  C1  3.222(2)  .  .  ?
   Cu  C2a  2.949(3)  .  .  ?
   Cu  C4a  2.796(3)  .  .  ?
   Cu  C4a'  2.848(3)  .  .  ?
   Cu  C2a'  3.013(2)  .  .  ?
   Cu  C2b  3.018(3)  .  .  ?
   Cu  C4b  2.856(3)  .  .  ?
   Cu  C4b'  2.791(3)  .  .  ?
   Cu  C2b'  2.928(3)  .  .  ?
   Cu  C2c  3.556(3)  .  .  ?
   Cu  C2c'  3.518(3)  .  .  ?
   Cu  C1'  3.232(2)  .  .  ?
   Cu  H3a  2.40(3)  .  .  ?
   Cu  H4aB  3.04(3)  .  .  ?
   Cu  H3a'  2.26(3)  .  .  ?
   Cu  H3b  2.31(3)  .  .  ?
   Cu  H4b'A  3.05(3)  .  .  ?
   Cu  H3b'  2.37(3)  .  .  ?
   Cu  H2cA  2.92(3)  .  .  ?
   Cu  H2c'B  2.85(2)  .  .  ?
   N0  C02  2.527(3)  .  .  ?
   N0  C2a  2.458(4)  .  .  ?
   N0  C2b  2.434(4)  .  .  ?
   N0  C2c  2.416(4)  .  .  ?
   N0  N3c  2.811(3)  .  .  ?
   N0  Cl2  3.147(3)  .  '1 655'  ?
   N0  Cl3  3.122(3)  .  .  ?
   N0  O02  2.869(3)  .  '3 766'  ?
   N0  H01A  2.01(3)  .  '1 655'  ?
   N0  H01B  2.03(3)  .  '1 655'  ?
   N0  H2aB  2.38(3)  .  .  ?
   N0  H2bB  2.49(3)  .  .  ?
   C01  O2  2.349(3)  .  .  ?
   C01  C1  2.497(4)  .  .  ?
   C01  C2a  2.906(4)  .  .  ?
   C01  C2c  2.887(4)  .  .  ?
   C01  N3c  2.467(4)  .  .  ?
   C01  H0A  1.93(3)  .  .  ?
   C01  H0B  1.97(4)  .  .  ?
   C02  C1  2.893(4)  .  .  ?
   C02  C2c  2.474(4)  .  .  ?
   C02  C4c  2.431(4)  .  .  ?
   C02  H01A  2.12(3)  .  '1 655'  ?
   C02  H01B  2.04(3)  .  '1 655'  ?
   C02  H4cB  2.46(3)  .  .  ?
   O2  N3a'  2.974(3)  .  '2 645'  ?
   O2  N3c  2.275(3)  .  .  ?
   O2  C4c  2.755(4)  .  .  ?
   O2  H3a'  2.32(3)  .  '2 645'  ?
   O2  H4cB  2.38(3)  .  .  ?
   C1  N3a  2.566(3)  .  .  ?
   C1  N3b  2.527(3)  .  .  ?
   C1  N3c  2.506(3)  .  .  ?
   C1  H0A  1.96(3)  .  .  ?
   C1  H0B  1.95(3)  .  .  ?
   C1  H2aA  2.07(3)  .  .  ?
   C1  H2aB  2.09(3)  .  .  ?
   C1  H2bA  2.06(3)  .  .  ?
   C1  H2bB  2.05(3)  .  .  ?
   C1  H2cA  2.07(3)  .  .  ?
   C1  H2cB  2.05(3)  .  .  ?
   C2a  C4a  2.489(4)  .  .  ?
   C2a  C2b  2.611(4)  .  .  ?
   C2a  C2c  2.588(4)  .  .  ?
   C2a  H3a  1.98(3)  .  .  ?
   N3a  C4a'  2.472(3)  .  .  ?
   N3a  N3a'  2.774(3)  .  .  ?
   N3a  C2b  2.897(4)  .  .  ?
   N3a  N3b  2.875(4)  .  .  ?
   N3a  O01  2.837(3)  .  '1 655'  ?
   N3a  H2aA  2.01(3)  .  .  ?
   N3a  H2aB  2.05(3)  .  .  ?
   N3a  H4aA  2.04(3)  .  .  ?
   N3a  H4aB  2.00(3)  .  .  ?
   C4a  N3a'  2.432(3)  .  .  ?
   C4a  H3a  1.96(3)  .  .  ?
   C4a  H4a'A  2.08(3)  .  .  ?
   C4a  H4a'B  2.06(2)  .  .  ?
   C4a'  C2a'  2.541(4)  .  .  ?
   C4a'  H4aA  2.09(3)  .  .  ?
   C4a'  H4aB  2.08(3)  .  .  ?
   C4a'  H3a'  1.96(3)  .  .  ?
   N3a'  N3b'  2.847(4)  .  .  ?
   N3a'  C2c'  2.970(4)  .  .  ?
   N3a'  C1'  2.544(4)  .  .  ?
   N3a'  H4a'A  2.05(3)  .  .  ?
   N3a'  H4a'B  2.05(3)  .  .  ?
   N3a'  H2a'A  2.05(2)  .  .  ?
   N3a'  H2a'B  1.99(3)  .  .  ?
   C2a'  N3b'  2.858(4)  .  .  ?
   C2a'  C2b'  2.581(4)  .  .  ?
   C2a'  C2c'  2.500(4)  .  .  ?
   C2a'  N0'  2.422(4)  .  .  ?
   C2a'  H3a'  1.94(3)  .  .  ?
   C2b  C4b  2.537(4)  .  .  ?
   C2b  C2c  2.499(4)  .  .  ?
   C2b  H3b  1.84(3)  .  .  ?
   N3b  C4b'  2.424(4)  .  .  ?
   N3b  N3b'  2.759(3)  .  .  ?
   N3b  C2c  2.991(3)  .  .  ?
   N3b  O02  2.987(3)  .  .  ?
   N3b  H2bA  2.00(3)  .  .  ?
   N3b  H2bB  2.07(3)  .  .  ?
   N3b  H4bA  2.01(3)  .  .  ?
   N3b  H4bB  2.05(3)  .  .  ?
   C4b  N3b'  2.457(3)  .  .  ?
   C4b  H3b  1.85(3)  .  .  ?
   C4b  H4b'A  2.10(3)  .  .  ?
   C4b  H4b'B  2.06(3)  .  .  ?
   C4b'  C2b'  2.486(4)  .  .  ?
   C4b'  H4bA  2.11(2)  .  .  ?
   C4b'  H4bB  2.07(3)  .  .  ?
   C4b'  H3b'  1.92(3)  .  .  ?
   N3b'  C1'  2.574(3)  .  .  ?
   N3b'  O2'  2.923(3)  .  2  ?
   N3b'  H4b'A  2.05(3)  .  .  ?
   N3b'  H4b'B  2.00(3)  .  .  ?
   N3b'  H2b'A  2.00(3)  .  .  ?
   N3b'  H2b'B  2.04(3)  .  .  ?
   C2b'  C2c'  2.591(4)  .  .  ?
   C2b'  N0'  2.427(3)  .  .  ?
   C2b'  C01'  2.871(4)  .  .  ?
   C2b'  H3b'  1.88(3)  .  .  ?
   C2c  C4c  2.504(4)  .  .  ?
   C2c  H0B  2.49(3)  .  .  ?
   N3c  C4c'  2.523(3)  .  .  ?
   N3c  H2cA  2.00(3)  .  .  ?
   N3c  H2cB  1.97(3)  .  .  ?
   N3c  H4cA  1.94(3)  .  .  ?
   N3c  H4cB  1.98(3)  .  .  ?
   C4c  N3c'  2.512(3)  .  .  ?
   C4c  H4c'A  2.05(2)  .  .  ?
   C4c  H4c'B  2.11(3)  .  .  ?
   C4c'  C2c'  2.500(4)  .  .  ?
   C4c'  C02'  2.430(4)  .  .  ?
   C4c'  O2'  2.738(4)  .  .  ?
   C4c'  H4cA  1.97(3)  .  .  ?
   C4c'  H4cB  1.97(3)  .  .  ?
   N3c'  C1'  2.519(3)  .  .  ?
   N3c'  N0'  2.853(3)  .  .  ?
   N3c'  C01'  2.450(3)  .  .  ?
   N3c'  O2'  2.261(3)  .  .  ?
   N3c'  H4c'A  1.99(3)  .  .  ?
   N3c'  H4c'B  2.04(3)  .  .  ?
   N3c'  H2c'A  2.01(3)  .  .  ?
   N3c'  H2c'B  2.05(3)  .  .  ?
   C2c'  N0'  2.447(3)  .  .  ?
   C2c'  C01'  2.852(4)  .  .  ?
   C2c'  C02'  2.475(4)  .  .  ?
   C2c'  H4a'A  2.49(3)  .  .  ?
   C2c'  H0'  2.49(3)  .  .  ?
   C1'  C01'  2.426(4)  .  .  ?
   C1'  C02'  2.889(4)  .  .  ?
   C1'  H2a'A  2.09(3)  .  .  ?
   C1'  H2a'B  2.09(3)  .  .  ?
   C1'  H2b'A  2.08(3)  .  .  ?
   C1'  H2b'B  2.20(3)  .  .  ?
   C1'  H2c'A  2.05(3)  .  .  ?
   C1'  H2c'B  2.10(2)  .  .  ?
   C1'  H0'  1.89(3)  .  .  ?
   N0'  C02'  2.556(4)  .  .  ?
   N0'  H2b'A  2.36(3)  .  .  ?
   N0'  H01'A  2.08(3)  .  .  ?
   N0'  H01'B  2.01(3)  .  .  ?
   C01'  O2'  2.392(3)  .  .  ?
   C01'  H0'  1.89(4)  .  .  ?
   C02'  H4c'A  2.44(3)  .  .  ?
   C02'  H01'A  1.99(3)  .  .  ?
   C02'  H01'B  2.03(3)  .  .  ?
   O2'  H3b'  2.10(3)  .  '2 545'  ?
   O2'  H4c'A  2.32(3)  .  .  ?
   Cl1  O02  3.140(2)  .  .  ?
   Cl1  H2aA  2.61(3)  .  '2 655'  ?
   Cl1  H4c'B  2.77(3)  .  '2 655'  ?
   Cl1  H02b  2.3628(7)  .  .  ?
   Cl2  O01  3.177(2)  .  .  ?
   Cl2  H0A  2.32(3)  .  '1 455'  ?
   Cl2  H4bA  2.74(2)  .  '3 666'  ?
   Cl2  H2b'B  2.76(3)  .  .  ?
   Cl2  H01b  2.3552(8)  .  '1 455'  ?
   Cl2  H101  2.55(6)  .  '4 455'  ?
   Cl3  O01  3.160(2)  .  '3 666'  ?
   Cl3  H0B  2.28(4)  .  .  ?
   Cl3  H2cB  2.60(3)  .  .  ?
   Cl3  H0'  2.54(4)  .  4  ?
   Cl3  H01a  2.2662(8)  .  '3 766'  ?
   O01  H3a  1.96(3)  .  '1 455'  ?
   O02  O101  2.740(6)  .  '2 655'  ?
   O02  H3b  2.24(3)  .  .  ?
   O101  C102  2.387(6)  .  .  ?
   O101  H02a  1.864(5)  .  '2 645'  ?
   O101  H101A  2.36(4)  .  .  ?
   O101  H101B  2.03(4)  .  .  ?
   C101  H101  1.96(7)  .  .  ?
   C101  H102A  2.04(5)  .  .  ?
   C101  H102B  2.11(3)  .  .  ?
   C101  H102C  2.22(5)  .  .  ?
   C102  H101A  2.26(3)  .  .  ?
   C102  H101B  2.04(4)  .  .  ?
   H0A  H0B  1.46(5)  .  .  ?
   H01A  H01B  1.63(5)  .  .  ?
   H2aA  H2aB  1.62(4)  .  .  ?
   H4aA  H4aB  1.60(4)  .  .  ?
   H4a'A  H4a'B  1.65(4)  .  .  ?
   H2a'A  H2a'B  1.58(4)  .  .  ?
   H2bA  H2bB  1.58(4)  .  .  ?
   H4bA  H4bB  1.59(4)  .  .  ?
   H4b'A  H4b'B  1.61(4)  .  .  ?
   H2b'A  H2b'B  1.67(4)  .  .  ?
   H2cA  H2cB  1.62(4)  .  .  ?
   H2cA  H2c'B  1.94(4)  .  .  ?
   H4cA  H4cB  1.51(4)  .  .  ?
   H4c'A  H4c'B  1.65(4)  .  .  ?
   H2c'A  H2c'B  1.65(3)  .  .  ?
   H01'A  H01'B  1.59(4)  .  .  ?
   H01a  H01b  1.4966(2)  .  .  ?
   H02a  H02b  1.22287(14)  .  .  ?
   H101A  H101B  1.72(6)  .  .  ?
   H102A  H102B  1.54(6)  .  .  ?
   H102A  H102C  1.56(7)  .  .  ?
   H102B  H102C  1.60(6)  .  .  ?
 
_atom_sites_solution_primary           ?
_atom_sites_solution_secondary         ?
_atom_sites_solution_hydrogens         ?
 
_geom_special_details                  ?
 
 
_cell_special_details
;      ?
;
 
_exptl_special_details
;      ?
;
 
_diffrn_special_details
;      ?
;
 
_chemical_compound_source              ?
_chemical_name_systematic              ?
_chemical_name_common                  ?
_chemical_formula_analytical           ?
_chemical_formula_structural           ?
 
_exptl_crystal_F_000                   1364
 
loop_
_diffrn_standard_refln_index_h
_diffrn_standard_refln_index_k
_diffrn_standard_refln_index_l
   ?  ?  ?
loop_
_diffrn_attenuator_code
_diffrn_attenuator_scale
   ?  ?
 
_reflns_limit_h_min                    0
_reflns_limit_h_max                    13
_reflns_limit_k_min                    0
_reflns_limit_k_max                    19
_reflns_limit_l_min                    -27
_reflns_limit_l_max                    27
_reflns_number_observed                ?
_reflns_d_resolution_high              .726
_reflns_d_resolution_low               11.693
 
_diffrn_reflns_av_sigmaI/netI          .069
_diffrn_reflns_theta_min               1.74
_diffrn_reflns_reduction_process       ?
 
_diffrn_ambient_temperature            150
_diffrn_radiation_source               'sealed tube'
_diffrn_radiation_monochromator        graphite
_diffrn_radiation_detector             'CCD area detector'
 
_refine_ls_extinction_expression       ?
_refine_ls_matrix_type                 full
_refine_ls_number_restraints           0
_refine_ls_number_constraints          0
_refine_ls_R_factor_all                .062
_refine_ls_wR_factor_all               .05
_refine_ls_goodness_of_fit_all         1.256
_refine_ls_shift/su_mean               .001
 
 
 
#==========================================================================
#       Structure Factor lists should be submitted as separate files
#==========================================================================
 
#data_<structure> # but for xtal use the refln data is needed in same block
 
loop_
_refln_index_h
_refln_index_k
_refln_index_l
_refln_F_meas
_refln_F_calc
_refln_F_sigma
_refln_F_squared_meas
_refln_F_squared_calc
_refln_F_squared_sigma
_refln_observed_status
_refln_F_meas_friedel
_refln_F_sigma_friedel
_refln_F_squared_meas_friedel
_refln_F_squared_sigma_friedel
                ?  ?  ?  ?  ?  ?  ?  ?  ?  ?  ?  ?  ?  ?
 
 
#===END
